1 **Recent origin of Neotropical orchids in the world's richest plant biodiversity**  
2 **hotspot**

3

4 Oscar Alejandro Pérez-Escobar<sup>a,1</sup>, Guillaume Chomicki<sup>b,1</sup>, Fabien L. Condamine<sup>c</sup>,  
5 Adam P. Karremans<sup>d,e</sup>, Diego Bogarín<sup>d,e</sup>, Nicholas J. Matzke<sup>f</sup>, Daniele Silvestro<sup>g,h</sup>,  
6 Alexandre Antonelli<sup>g,i</sup>

7

8 <sup>a</sup>Identification and Naming Department, Royal Botanic Gardens, Kew, Richmond,  
9 Surrey, TW9 3DS, UK. <sup>b</sup>Systematic Botany and Mycology, University of Munich  
10 (LMU), 67 Menzinger Str., Munich 80638, Germany. <sup>c</sup>CNRS, UMR 5554 Institut des  
11 Sciences de l'Evolution (Université de Montpellier), Place Eugène Bataillon, 34095  
12 Montpellier, France. <sup>d</sup>Lankester Botanical Garden, University of Costa Rica, P.O. Box  
13 302-7050 Cartago, Costa Rica. <sup>e</sup>Naturalis Biodiversity Center, Leiden, The  
14 Netherlands. <sup>f</sup>Division of Ecology, Evolution, and Genetics, Research School of  
15 Biology, The Australian National University, Canberra, ACT 2601, Australia.  
16 <sup>g</sup>Department of Biological and Environmental Sciences, University of Gothenburg,  
17 413 19 Gothenburg, Sweden; <sup>h</sup>Department of Ecology and Evolution, Biophore,  
18 University of Lausanne, 1015 Lausanne, Switzerland; <sup>i</sup>Gothenburg Botanical Garden,  
19 Carl Skottsbergs gata 22A, 41319, Gothenburg, Sweden.

20

21 <sup>1</sup>These authors contributed equally to this study.

22

23 Running title: Recent origin of orchids in the Andes

24 Word count: 3810 words

25 4 Figures

26

27 Corresponding authors:

28 Oscar Alejandro Pérez-Escobar

29 Email: [oopereze@yahoo.com](mailto:oopereze@yahoo.com)

30

31 Guillaume Chomicki

32 Email: [guillaume.chomicki@gmail.com](mailto:guillaume.chomicki@gmail.com)

33 **Abstract [190 words]**

- 34       • The Andean mountains of South America are the most species-rich  
35       biodiversity hotspot worldwide with about 15% of the world’s plant species, in  
36       only 1% of the world's land surface. Orchids are a key element of the Andean  
37       flora, and one of the most prominent components of the Neotropical epiphyte  
38       diversity, yet very little is known about their origin and diversification.  
39       • We address this knowledge gap by inferring the biogeographical history and  
40       evolutionary dynamics of the two largest Neotropical orchid groups  
41       (Cymbidieae and Pleurothallidinae), using two unparalleled, densely-sampled  
42       orchid phylogenies (including 400+ newly generated DNA sequences),  
43       comparative phylogenetic methods, geological and biological datasets.  
44       • We find that the majority of Andean orchid lineages only originated in the last  
45       15 million years. Most Andean lineages are derived from lowland Amazonian  
46       ancestors, with additional contributions from Central America and the  
47       Antilles. Species diversification is correlated with Andean orogeny, and  
48       multiple migrations and re-colonizations across the Andes indicate that  
49       mountains do not constrain orchid dispersal over long timescales.  
50       • Our study sheds new light on the timing and geography of a major Neotropical  
51       radiation, and suggests that mountain uplift promotes species diversification  
52       across all elevational zones.

53

54       **Keywords:** Tropical Andes, mountain building, Orchidaceae, evolution,  
55       diversification.

56

## 57 **Introduction**

58 Species richness is unevenly distributed in time (Simpson, 1953), space  
59 (Willis, 1922), and across the Tree of Life (Vargas & Zardoya, 2014). Understanding  
60 the processes underlying current patterns in species richness and distribution  
61 constitutes therefore a major scientific challenge. The Andean mountains of South  
62 America contain about 15% of the world's plant species, in only 1% of the world's  
63 land surface – resulting in the most species-rich biodiversity hotspot worldwide  
64 (Myers *et al.*, 2000). A large proportion of this diversity is found in high-altitude  
65 grasslands, and is suggested to have resulted from recent rapid speciation events  
66 (Hughes & Eastwood, 2006; Hughes & Atchison, 2015). By contrast, Andean  
67 seasonally dry forests experienced much slower diversification and have older origins  
68 (Pennington *et al.*, 2010), suggesting contrasted macro-evolutionary histories within  
69 the Andean biodiversity hotspot (Valencia *et al.*, 1994; Pennington *et al.*, 2010; ter  
70 Steege *et al.*, 2013).

71 In a seminal paper, (Gentry, 1982) postulated that mountain uplift was a major  
72 trigger of Andean mega-diversity, although he posited that this might have occurred  
73 indirectly via biotic interactions. A pivotal result of Gentry's floristic analyses was the  
74 discovery of two patterns of plant distribution in the Neotropics: "Amazonian-  
75 centered" and "Andean-centered" taxa (Gentry, 1982). Amazonian-centered taxa  
76 consist mostly of canopy trees and lianas, while Andean-centered taxa are almost  
77 exclusively epiphytes and shrubs (Gentry, 1982). The latter occur mostly in the  
78 Northern Andes, with secondary centres in the Brazilian coastal mountains and  
79 Central America, together accounting for about 33% of all Neotropical plants (Gentry,  
80 1982) and thus largely contributing the world's most species-rich biodiversity hotspot,  
81 the tropical Andes (Myers *et al.*, 2000). Contrasting with dominant views at the time,  
82 Gentry (1982) hypothesized that the Andean-centered flora resulted from "recent, very  
83 dynamic speciation".

84 Orchids are one of the most characteristic and diverse components of the  
85 Andean flora (Gentry & Dodson, 1987; Krömer & Gradstein, 2003; Richter *et al.*,  
86 2009; Parra-Sánchez *et al.*, 2016). They often make up to 30 to 50% of the total  
87 epiphytic species number reported along Northern Andes (Kreft *et al.*, 2004; Küper *et*  
88 *al.*, 2004), and epiphytic orchids account for 69% of all vascular epiphytes worldwide  
89 (Zotz & Winkler, 2013). Neotropical epiphytic orchids are generally characterized by  
90 narrowly restricted populations with small numbers of individuals (Tremblay &

91 Ackerman, 2001; Jost, 2004; Crain & Tremblay, 2012; Pandey *et al.*, 2013). Despite  
92 the ecological importance and prominence of epiphytic orchids (and of epiphyte  
93 diversity overall) in the Andean flora, their origin and diversification have not been  
94 explicitly studied due to the difficulties in generating densely sampled and strongly  
95 supported phylogenies.

96 We address this issue by studying the evolutionary history of the two largest  
97 Neotropical orchid clades, namely Cymbidieae and Pleurothallidinae. The  
98 Cymbidieae comprise over 3,700 species, 90% of which occur in the Neotropics  
99 (remaining species occur in tropical Africa and Australasia). Cymbidieae includes 12  
100 subtribes, of which four are the most speciose and Andean-dwelling subclades (i.e.  
101 Maxillariinae, Oncidiinae, Stanhopeinae and Zygopetaliinae; Pridgeon *et al.*, 2009).  
102 Pleurothallidinae comprise 44 genera and 5100 exclusively Neotropical species  
103 (Karremans, 2016) distributed mostly in highlands of the Northern Andes and Central  
104 America. Together, they are the most representative elements of the Andean orchid  
105 flora (Pridgeon *et al.*, 2009; Kolanowska, 2014), and they make up most of their  
106 species richness. In addition, these lineages have evolved a rich array of pollination  
107 syndromes and sexual systems (Gerlach & Schill, 1991; Pérez-Escobar *et al.*, 2016b)  
108 that have long fascinated botanists and naturalists (Lindley, 1843; Darwin, 1877).  
109 This is particularly true for Cymbidieae, in which up to seven pollination syndromes  
110 have been recorded (van der Cingel, 2001; Pridgeon *et al.*, 2009), ranging from  
111 species exclusively pollinated by male Euglossini bee (Ramirez *et al.*, 2011) to those  
112 pollinated only by oil bees. Data on pollination ecology of Pleurothallidinae is very  
113 scarce, but scattered reports across the clade suggest that they are mostly pollinated by  
114 a vast array of Diptera lineages (Blanco & Barboza, 2005; Pupulin *et al.*, 2012).

115 Rapid Andean orogeny could have promoted orchid species richness by  
116 creating ecological opportunities such as increasing landscape, mediating local  
117 climate change, creating novel habitats, and forming insular environments that  
118 affected migrations and allopatric speciation through isolation (Hoorn *et al.*, 2013).  
119 This effect should have been most accentuated over the last 10 million years (Ma),  
120 during which ca 60% of the current elevation of the Andes was achieved (Gregory-  
121 Wodzicki, 2000). Diversification studies of Andean-centered clades provide evidence  
122 for rapid diversification that temporally matches the Andean surface uplift, notably in  
123 the plant genera *Lupinus*, *Espeletia*, *Halenia*, *Heliotropium*, and in families  
124 Campanulaceae and Annonaceae (von Hagen & Kadereit, 2003; Bell & Donoghue,

125 2005; Donoghue & Winkworth, 2005; Hughes & Eastwood, 2006; Pirie *et al.*, 2006;  
126 Antonelli *et al.*, 2009b; Luebert *et al.*, 2011; Drummond *et al.*, 2012; Madriñán *et al.*,  
127 2013; Lagomarsino *et al.*, 2016). Taken together, these studies suggest that rapid  
128 Andean uplift yielded new niches that fostered both adaptive and non-adaptive  
129 radiations (Nevado *et al.*, 2016). Other Andean groups, such as hummingbirds,  
130 diversified mostly prior to Andean uplift (McGuire *et al.*, 2014), or after it had  
131 attained most of its currently height (Smith *et al.*, 2014).

132 We address the impact of the Andean uplift on the diversity and distribution of  
133 orchids by inferring the dynamics of speciation, extinction, and migration while  
134 simultaneously incorporating surface uplift of the two largest Andean Neotropical  
135 orchid clades Cymbidieae and Pleurothallidinae. We rely on model-based inference  
136 methods in historical biogeography, ancestral area and character estimation  
137 approaches, and a series of diversification analyses to investigate the following  
138 questions: (i) Where do Andean orchids come from? (ii) Is there evidence for the  
139 Andes acting as a dispersal barrier for epiphytic lowland taxa? (iii) Did the Andean  
140 uplift enhance orchid diversification, and if so was this effect evident on species at all  
141 or just the highest elevations? (iv) Is Andean diversity derived from pre-adapted  
142 lineages or rather descendant of lowland migrants? In addition, we use the limited  
143 available data to evaluate whether shifts in pollination syndromes are associated to  
144 changes in diversification rates.

145 Our results support Gentry's (Gentry, 1982) prediction that Andean-centered  
146 groups result from recent rapid speciation, suggesting that Andean orogeny provided  
147 opportunities for rapid orchid species diversification in the world's premier plant  
148 biodiversity hotspot. Such diversity is derived from lowland lineages but more rarely  
149 from migrants already pre-adapted to cool environments, a more frequent situation  
150 documented from other mountain environments (Merckx *et al.*, 2015).

151

152

## 153 **Material and Methods**

### 154 *Taxon sampling, DNA sequencing and phylogenetic analysis*

155 To generate solid phylogenies of the tribe Cymbidieae and subtribe  
156 Pleurothallidianaee, we newly generated a total of 420 sequences of the nuclear  
157 ribosomal internal transcribed spacer (ITS), and a ~1500 bp fragment of the gene *ycf1*  
158 of under-represented lineages of key biogeographical importance. DNA amplification,

159 PCR product purification and sequencing were conducted as previously described  
160 (Pérez-Escobar *et al.*, 2016b). Voucher information and GenBank accession numbers  
161 are provided in Tables S1 and S2.

162 We merged our novel dataset with previously generated data from the studies  
163 of (Blanco *et al.*, 2007), (Whitten *et al.*, 2014), and (Ramirez *et al.*, 2011), using the  
164 R-package MEGAPTERA v.2 (Heibl, 2014). We retrieved 3541 sequences of nuclear  
165 (ITS) and plastid (*matK*, *trnL-F* region, *psbA*, *ycf1*). We selected outgroup taxa  
166 representing the old and new world subtribes Polystachyinae, Aeridinae and  
167 Laeliinae. Trees were rooted on *Calypso bulbosa* (for Cymbidieae) and *Arpophyllum*  
168 *giganteum* (for Pleurothallidinae) following Whitten *et al.* (2014).

169 Poorly aligned positions were excluded from the alignments using GBLOCKS  
170 v.0.9 (Talavera & Castresana, 2007). To statistically detect potential incongruences  
171 between plastid and nuclear DNA phylogenies, we used the tool Procrustes Approach  
172 to Cophylogeny (PACo) (Balbuena *et al.*, 2013; Pérez-Escobar *et al.*, 2016a).  
173 Maximum-Likelihood (ML) tree inference was performed using RAxML-HPC v.8.0  
174 (Stamatakis, 2014), under the GTR+G substitution model with four gamma categories  
175 (best model for both datasets as inferred via AIC in jModelTest v.2.1.6 (Darriba *et al.*,  
176 2012), with 1000 bootstrap replicates and data partitioning by genome compartment.  
177 All phylogenetic and dating analyses were performed in the CIPRES Science  
178 Gateway computing facility (Miller *et al.*, 2015).

179

### 180 *Molecular clock dating*

181 A few unambiguous orchid macrofossils are available for Orchidaceae  
182 (*Dendrobium winikaphyllum*, *Earina fouldenensis*, *Meliorchis caribea* (Ramírez *et al.*,  
183 2007; Conran *et al.*, 2009), but these are assigned to lineages very distantly related to  
184 our groups of interest. Using distant outgroups to calibrate our Cymbidieae and  
185 Pleurothallidinae phylogenies would have created extensive sampling heterogeneities,  
186 which can result in spurious results (Drummond & Bouckaert, 2014). Thus, we had to  
187 rely on secondary calibrations. In order to obtain the best secondary calibration points  
188 possible, we first generated an Orchidaceae-wide fossil-calibrated phylogeny,  
189 sampling 316 orchid species sampled as evenly as possible along the tree. Detailed  
190 settings and fossil calibrations used to generate an Orchidaceae-wide phylogeny are  
191 provided in the extended Material and Methods of Appendix S1.

192 Secondary calibration points were obtained from our Orchidaceae-wide dated  
193 phylogeny, and the MRCA of Cymbidieae + Vandeae was dated to  $34 \pm 7$  Ma, 95%  
194 credible interval, whereas that of Pleurothallidinae + Laelinae was estimated to  $20 \pm 7$   
195 Ma. We therefore used a normal prior (with values of mean = 34, stdev = 4 for  
196 Cymbidieae; mean = 20, stdev = 3 for Pleurothallidinae, to reflect the 95% CI from  
197 our fossil-calibrated tree) to calibrate our trees using this secondary constraint, which  
198 was designed to reflect the uncertainty previously estimated for the root node of  
199 Cymbidieae and Pleurothallidinae.

200

#### 201 *Ancestral range estimation*

202 Species ranges were coded from the literature (Pridgeon *et al.*, 2009) and from  
203 herbarium specimens through a survey of virtual collections and loans of several  
204 herbaria (AMES, COL, F, MO, SEL, US, M) as well as the GBIF repository. To  
205 query GBIF database, we relied on the function *occ* of the R-package SPOCC (Scott  
206 *et al.*, 2015). A total of 19486 distribution records were compiled for the Cymbidieae,  
207 and 9042 records for the Pleurothallidinae. Protocols for distribution maps and species  
208 richness pattern analyses are detailed in Appendix S1.

209 Distribution maps for Cymbidieae and Pleurothallidinae (summarized in Figs.  
210 S1, S2) and extant distribution patterns identified for other plant lineages (e.g.  
211 Rubiaceae [Antonelli *et al.*, 2009b]) allowed the identification of 10 main distribution  
212 areas (see the inset in Fig. 1 and 2). Species were assigned to one of these regions: (i)  
213 Central America (comprising southern Florida to Panama); (ii) West Indies; (iii)  
214 Northern Andes (mountain ranges from elevations higher than 500 m in Colombia and  
215 Venezuela); (iv) Central Andes (from Peru to the Tropic of Capricorn, from elevations  
216 higher than 500 m); (v) Amazonia, including lowlands and montane forest below 500  
217 m in Colombia, Ecuador, Peru, Brazil, Venezuela, Guyana, Suriname and French  
218 Guiana; (vi) The Guiana shield, including elevations higher than 500 m in north-  
219 eastern South America (Brazil, Guyana, Suriname and Venezuela); (vii) Southeastern  
220 South America, including the Brazilian shield but also lowlands in eastern Brazil and  
221 Northern Argentina; (viii) Chocó (comprises lowlands below 500 m of the western  
222 Andes in Colombia, Ecuador); (ix) Africa and (x) Australasia. To infer the ancestral  
223 range of all examined lineages in Cymbidieae and Pleurothallidinae, we used the R  
224 package BioGeoBEARS v.0.2.1 (Matzke, 2013, 2014). In addition, in order to

225 estimate the number of migrations, dispersals, extinctions and sympatric speciation  
226 events from our phylogeny, we used Biogeographical Stochastic Mapping (BSM)  
227 (Matzke, 2014) under the best-fit model, as implemented in BioGeoBEARS (for  
228 detailed settings see Appendix S1).

229

### 230 *Rates of species diversification*

231 To infer the diversification dynamics of the Cymbidieae and Pleurothallidinae, we  
232 first used a time-dependent model implemented in BAMM v.2.5.0 (Rabosky, 2014) to  
233 estimate rates of extinction and speciation across the phylogenies. Incomplete taxon  
234 sampling was accounted for by assigning a sampling fraction of 25% of the extant  
235 orchid diversity of Cymbidieae, and 13% of Pleurothallidinae (sampling fractions of  
236 every genus sampled was incorporated according to [Chase *et al.*, 2015]). We  
237 performed three runs with 1 million MCMC generations, sampling parameters every  
238 10,000 generations. Diversification rates and rate shift configurations were plotted  
239 using the R package BAMMtools (Rabosky *et al.*, 2014). We checked the  
240 convergence of the runs by plotting the log-likelihood across MCMC generations  
241 sampled in the “mcmc\_out” file. To evaluate the best model generated by BAMM  
242 (compared with a null  $M_0$  model with no diversification rates shifts), we relied on  
243 Bayes Factors calculated with the *ComputeBayesFactor* function of BAMMtools. We  
244 examined the 95% credible set of macroevolutionary shift configuration using the  
245 BAMMtools function *credibleShiftSet*. Settings for the BAMM cross validation  
246 analysis carried in RPANDA (Morlon *et al.*, 2016) are provided in Appendix S1.

247

### 248 *Geographic state-dependent analyses*

249 We used GeoSSE (Goldberg *et al.*, 2011), an extension of the BiSSE model that  
250 allows lineages to occur simultaneously in two areas and to test whether one area has  
251 overall higher speciation rates, as implemented in the R package *diversitree* v.0.9-7  
252 (Fitzjohn, 2012). To test whether lineages restricted to the Northern Andes (“A”) had  
253 higher diversification rates than lineages absent from the Northern Andes (collectively  
254 called “B” here), we used Bayesian MCMC GeoSSE analyses of 1 million  
255 generations on the maximum clade credibility tree from BEAST (in the particular case  
256 of Cymbidieae, only Neotropical representatives were included). Implemented models



257 in GeoSSE and settings of tailored simulation to account for Type I error bioases in  
258 GeoSSE are provided in Appendix S1.

259

#### 260 *Mapping speciation rate in the Neotropics*

261 Based on the speciation and extinction rates inferred for orchid lineages, and their  
262 geographic occurrence, it is possible to identify important areas of diversification as  
263 plotted on a heat map (Condamine & Kergoat, 2013). For this purpose, we designed a  
264 novel method that consists on retrieving speciation ( $\lambda$ ) rates from BAMM  
265 analyses using the function *GetTipsRates* in BAMMtools v.2.1 (Rabosky *et al.*, 2014)  
266 and to link them to species occurrences. Rates were further associated to known  
267 distribution records of Cymbidieae and Pleurothallidinae and interpolated to a  
268 polygon representing the currently known distribution of Cymbidieae and  
269 Pleurothallidinae species, using the Inverse Distance Weight method implemented in  
270 the software ArcMap v.9.3 (Esri). To account for geographical sampling biases from  
271 herbarium records, we randomly sampled from 0.5x0.5-degree grid cells herbarium  
272 occurrences using the R package RASTER (Hijmans & Elith, 2016) so that a single  
273 occurrence per grid cell was kept.

274

#### 275 *Paleoelevation-dependent diversification*

276 We tested the effect of past environmental change on the diversification of  
277 Cymbidieae and Pleurothallidinae using birth-death models that allow speciation and  
278 extinction rates to vary according to a quantitative, time-dependent environmental  
279 variable (Condamine *et al.*, 2013), here the paleo-elevation of the northern Andes  
280 (Hoorn *et al.*, 2010). The R-package PSPLINE (Ramsey & Ripley, 2010) was used to  
281 interpolate a smooth line for Andean paleo-elevation. This smooth line was sampled  
282 during each birth-death modeling process to give the value of the paleoelevation  
283 variable at each time point. Speciation and extinction rates were then estimated as a  
284 function of these values along the time-calibrated phylogenies, according to the  
285 parameters of each model. The paleo-environmental-dependent model is implemented  
286 in the R-package RPANDA v.1.1 (Morlon *et al.*, 2016). Implemented models in  
287 RPANDA are provided in Appendix S1.

288

#### 289 *Ancestral character state estimation*

290 To account for potential biotic variables as drivers of Neotropical orchid  
291 diversification such as shifts on pollination syndromes (Givnish *et al.*, 2015), we  
292 compiled information on pollination syndromes of Cymbidieae from the literature  
293 (van der Cingel, 2001; Singer, 2002; Pansarin *et al.*, 2009; Pridgeon *et al.*, 2009;  
294 Gerlach, 2011; Ramirez *et al.*, 2011), and consulted experts on specific groups (see  
295 *Acknowledgements*). Due to a dearth of detailed information on pollination ecology  
296 (i.e. ~6% of taxa sampled), we followed a generalist coding approach, and seven  
297 pollination syndromes, (i.e. bee, bird, butterfly, lepidopteran, fly, wasp and self-  
298 pollination) were coded. To account for missing information on pollination  
299 syndromes, we assigned equal probabilities to all character states to taxa with  
300 unknown pollination syndrome. To estimate ancestral elevation ranges in  
301 Pleurothallidinae and Cymbidieae, we obtained absolute elevation values from  
302 herbarium records for every taxon sampled in our phylogenies. We obtained a mean  
303 of five values per taxa sampled, and we coded mean elevation values as a continuous  
304 character. Detailed settings for Ancestral Character State (ACS) of altitude and  
305 pollination syndromes are provided in Appendix S1.

306

## 307 **Results**

### 308 *Phylogenetics, age and biogeography of Andean orchids*

309 Analyses of phylogenetic incongruence detection identified 259 and 125  
310 potential conflicting tips in Cymbidieae and Pleurothallidinae, respectively (Fig.  
311 S27, 28), all of which clustered in weakly to moderately supported clades (<75%  
312 LBS), or in clades with extremely long branches. In the absence of supported  
313 phylogenetic conflicts, nuclear and chloroplast partitions of Cymbidieae and  
314 Pleurothallidinae were concatenated. For the Cymbidieae, our molecular dataset  
315 consisted of 6.6 kb DNA (five markers) for 816 species, and yielded the first strongly  
316 supported phylogeny of the tribe (Fig. S3). The Pleurothallidinae dataset was  
317 composed of 2.4 kb DNA (two markers) and 684 terminals, including in total 420  
318 newly generated sequences (Fig. S4). Both orchid phylogenies are strongly supported  
319 at most important nodes, with 618 nodes (76%) with a maximum likelihood bootstrap  
320 support (BS) > 75% for the Cymbidieae, and 321 nodes (47%) for the Pleurothallinae  
321 (Figs. S3, S4).

322 Ages obtained on our wide-orchid dated phylogeny were very similar from  
323 other recent orchid dating studies (Chomicki *et al.*, 2015; Givnish *et al.*, 2015). A

324 chronogram for the orchid family showing absolute ages and 95% confidence  
325 intervals for every node is provided in Fig. S5. Absolute ages obtained for  
326 Cymbidieae and Pleurothallidinae chronograms are also in agreement with previously  
327 published dated phylogenies (e.g. Ramirez *et al.*, 2011; Chomicki *et al.*, 2015;  
328 Givnish *et al.*, 2016). Divergence time estimates and 95% credible intervals inferred  
329 for all nodes of Cymbidieae and Pleurothallidinae chronograms are shown in Fig. S6  
330 and S7.

331 Our dating and biogeographic analyses identified DEC + J as best fitting  
332 model for both Cymbidieae and Pleurothallidinae (Table S3, S4). Under this model,  
333 an Australasian origin of the Cymbidieae around the Eocene/Oligocene boundary  
334 ( $34\pm 8$  Ma) was inferred (Fig. 1, Figs. S6, S8). We inferred a late Oligocene dispersal  
335 from Australasia to South America following the estimation of southern South  
336 America as ancestral area of *Cyrtopodium* and the rest of the Cymbidieae (Fig. 1; Fig.  
337 S8). Such dispersal corresponds to the final break-up of Gondwana (split between  
338 Antarctica and South America at Drake Passage). From the late Oligocene to the early  
339 Miocene, our analyses indicate dispersal from East to West in the Neotropics. The  
340 Northern Andean region was reached three times from Amazonia by the most recent  
341 common ancestor (MRCA) of Oncidiinae ca.  $\sim 19\pm 5$  Ma, Maxillariinae ca.  $11\pm 5$  Ma,  
342 and Stanhopeinae ca.  $13\pm 4$  Ma.

343 Ancestral state estimations of mean altitude further show that the MRCAs of  
344 Cymbidieae was likely adapted to lowland environments (ancestral elevation value of  
345 900 m; Fig. S9, S10). The MRCAs of Amazonian migrants that reached the Andes  
346 (i.e. Maxillariinae, Oncidiinae and Stanhopeinae) were also adapted to lowland  
347 habitats (mean elevation values of  $\sim 1300$ , 1200, and 900 m, respectively; Fig S9,  
348 S10). Strikingly, Oncidiinae and Maxillariinae are the species richest lineages in  
349 Cymbidieae (1,584 and 819 species, respectively; Chase *et al.*, 2015), and they are  
350 derived from lowland Amazonian migrators. Stanhopeinae subsequently dispersed to  
351 several other Neotropical regions, notably Central America (Fig. 1, Fig. S8).

352 Different from the Cymbidieae, we infer an origin of Pleurothallinae in  
353 Central America or the West Indies in the early Miocene, followed by a migration to  
354 the Northern Andes ca.  $16\pm 5$  Ma (Fig. 2, Fig. S7, S11), prior to the main uplift  
355 periods but at a time frame when the Northern Andes had already peaked mean  
356 elevations of  $\sim 1500$  m. However, the majority of early divergent Pleurothallidinae  
357 and their sister groups are from the Antilles, and thus the inference of Central

358 America as the ancestral area of Pleurothallidinae most likely reflects our inability to  
359 sample extensively the early diverging Antillean lineages. As inferred by ancestral  
360 state estimations, the MRCA of Pleurothallidinae was adapted to montane habitats  
361 (mean elevation of ~1200 m), and all Pleurothallidinae migrants to the Northern  
362 Andes were likely adapted to montane–cloud forest environments (mean elevation of  
363 ~1500 m; Fig. S12-S13). Biogeographical stochastic mapping indicates that in-situ  
364 speciation was the dominant biogeographic process in both clades, while processes of  
365 range expansion (dispersal and vicariance) and range contraction (subset speciation)  
366 were scarcer and relatively evenly distributed across lineages (Fig. 1-2; Fig. S14-S15).  
367

### 368 *Diversification of Andean orchids*

369 The diversification analyses performed with BAMM strongly rejected a  
370 constant-rate model (Bayes factor=151.3, Table S5), and instead identified four rate  
371 shifts during the evolutionary history of Cymbidieae (Fig. 3B; Figs. S16, S17). The  
372 best model configuration identified four shifts in speciation rate in the most speciose  
373 Cymbidieae lineages: one in Maxillariinae, one in Zygotetaliinae, and two in  
374 Oncidiinae. We further identified three rate shifts in the Pleurothallinae (Table. S6), in  
375 the MRCAs of *Lepanthes* + *Lepanthopsis*, *Dracula* + *Porroglossum* + *Masdevallia*,  
376 and *Stelis* + *Pabstiella* + *Pleurothallis* (Fig. 4B; Fig S18, S19). All shifts in  
377 diversification rates in Cymbidieae and Pleurothallidiane were further confirmed  
378 using the RPANDA method (Fig. S20, 21; Tables S7, S8).

379 Interestingly, the diversification rate shifts are all located at the origin of  
380 Northern Andean clades and temporally match with periods of accelerated Andean  
381 uplift in this region (Cymbidieae, Fig. 1), or within a clade that already inhabited the  
382 Northern Andes (e.g. Pleurothallinae, Fig. 2). To further explore this apparent  
383 correlation with either accelerated Andean uplift or presence in the Northern Andes  
384 and fast diversification, we used a trait-dependent approach (GeoSSE) that estimates  
385 region-dependent speciation rates. Here, a model with free rates fitted best our  
386 Cymbidieae and Pleurothallidinae dataset (Table S9), with differences in speciation  
387 ( $s_A - s_B$ ) and diversification ( $d_A - d_B$ ) rates highly if not maximally supported (0.99  
388 and 1 Bayesian Posterior Probabilities, respectively). GeoSSE analyses further  
389 indicated that speciation rates in Northern Andes are consistently higher than in any  
390 other biogeographical region (Fig 3C, 4C) in both Cymbidieae and Pleurothallidinae  
391 datasets. We evaluated and confirmed the robustness of these results through

392 extensive data simulations (Fig. S21). Here, the distribution delta AIC obtained from  
393 AIC values from real data and reshuffled data analyses was centered towards -20 and  
394 far away from 0 (i.e. AIC values obtained of real data set).

395 We developed a novel method to generate a ‘speciation rate map’ using  
396 inferred speciation rates for each orchid lineage and georeferenced species  
397 occurrences (see *Materials and Methods*). Our speciation rate maps are in agreement  
398 with GeoSSE results, and we confirmed that speciation rates in the Northern Andes  
399 were significantly higher than those in any other region (Figs. 3C, 4C). This is in  
400 agreement with a recent study with more limited taxon sampling for the two clades  
401 focused here (Givnish et al., 2015). The speciation rate map (*Materials and Methods*)  
402 further demonstrates that fastest speciation took place in the Northern Andes region,  
403 and reveals secondary speciation hotspots in the Central Andes, the Guiana Shield,  
404 and Central America (Fig. 3D, 4D). These secondary hotspots are occupied by species  
405 derived from the four highly diversifying Northern Andean Cymbidieae clades (Fig.  
406 S23), suggesting that the Andes acted as a major source of new lineages to the rest of  
407 the continent – thus greatly increasing Neotropical orchid diversity. This is  
408 particularly true for the Pleurothallidinae, where we identified multiple migrations  
409 from the Northern Andes of montane adapted lineages to Central America (Fig 2; Fig.  
410 S24). Interestingly, we also found a strong geographic correlation between current  
411 species richness and diversification (Figs. 3D, 4D, S25, S26), suggesting that recent  
412 *in-situ* speciation was the main process for species accumulation in the Neotropics.

413 While these results suggest an impact of the Andean uplift on species  
414 diversification, they do not explicitly account for biotic interactions, landscape and  
415 climatic changes through time. We therefore assessed the fit of a model that explicitly  
416 integrates paleo-elevation in diversification rate analyses (see *Materials and*  
417 *Methods*). In three of the four Cymbidieae clades where BAMM inferred a speciation  
418 rate shift, the paleo-elevation-dependent model inferred a continuous speciation  
419 increase from 10 to 6 Ma (Fig. 3E-F, Table S10). In contrast, no positive correlation  
420 with paleo-elevation and diversification could be detected for Pleurothallidinae (Table  
421 S11). Moreover, our ancestral character estimation of pollination syndromes in  
422 Cymbidieae suggests that the MRCA of Cymbidieae was bee pollinated (Fig. S29).  
423 Nine shifts of syndromes were identified along the evolutionary history of  
424 Cymbidieae, always derived from bee pollination. No reversals from other syndromes  
425 towards bee pollination were recovered (Fig. S29).

426

## 427 **Discussion**

428 *Andean orchids are mostly derived from lowland Amazonian migrants*

429 Our ancestral area estimations show that Andean orchid flora is derived primarily  
430 from Amazonian lowland taxa (i.e. MRCA of Oncidiinae, Maxillariinae and  
431 Stanhopeinae, the most speciose lineages in Cymbidieae), but to a lesser extent also  
432 from cool pre-adapted lineages (MRCA of most extant Andean centred Pleurothallid  
433 taxa). Previous research has revealed that mountain flora origin is strongly influenced  
434 by the immigration of cool pre-adapted lineages (Hughes & Eastwood, 2006; Merckx  
435 *et al.*, 2015; Uribe-Convers & Tank, 2015), and that contributions from lowland  
436 adapted lineages is rather rare. Our study points to the key role of Amazonia for the  
437 origin of Andean orchid diversity, and also reveals an ancient biological connectivity  
438 between this region and the Northern Andes.

439

440 *The Andes did not constrain orchid dispersal*

441 The recurrent migration back and forth through the Andes, even during the  
442 period of highest paleo-elevation, is also a central result from our study. The  
443 colonization of the Northern Andes by some clades of Cymbidieae matches in time  
444 with accelerated surface uplift (Fig. 1, Fig. S8), and reflects the Miocene biotic  
445 connectivity between the Andes and Amazonia previously suggested for plants  
446 (Antonelli *et al.*, 2009a), Poison dart frogs (Santos *et al.*, 2009), and birds (Brumfield  
447 & Edwards, 2007), among others. This suggests that shifts across elevational zones  
448 were rare, similarly to recent results in Mount Kinabalu in Borneo (Merckx *et al.*,  
449 2015).

450 Surprisingly, dispersal events across the Andes did not decrease during  
451 accelerated Andean uplift (Fig. 1, 2; Fig. S8, S11), suggesting that the uplift of the  
452 Andes did not act as a major dispersal barrier for Cymbidieae and Pleurothallidinae  
453 orchids, contrary to findings in other plant groups (e.g.: Annonaceae [Pirie *et al.*,  
454 2006], Rubiaceae [Antonelli *et al.*, 2009b] or Fabaceae [Pennington *et al.*, 2010]). This  
455 result likely relates to the biology of orchids, which produce large amounts of dust-  
456 like, wind-dispersed seeds allowing for occasional long-distance dispersal (Arditti &  
457 Ghani, 2000; Antonelli *et al.*, 2009a; Barthlott *et al.*, 2014; Givnish *et al.*, 2016).  
458 Taken together, these findings suggest that the Andes constitute a semi-permeable  
459 barrier to biotic dispersal, and that orchids may be more geographically constrained

460 by intrinsic factors such as fungal symbionts and pollinators, which differ among  
461 elevational zones (Arroyo *et al.*, 1982, 1985; Lugo *et al.*, 2008) than by distance.

462

#### 463 *Accelerated orchid diversification across elevational zones*

464 Gentry's hypothesis (Gentry, 1982) of rapid speciation in the Andes was  
465 mainly based on the observation of floristic groups ("Andean-centered taxa") with  
466 very speciose genera from the lowlands to mid-elevations in the (mostly Northern)  
467 Andes. This matches well the total altitudinal distribution of our respective study  
468 groups, with a richness-through-elevation plot for >55% of the 3,700 Cymbidieae  
469 species based on over 20,000 records (Fig. 3A; Fig. S1), which reveals that  
470 Cymbidieae diversity peaks at low elevations, while Pleurothallidinae (ca. 10,000  
471 records; Fig. S2) peaks at mid-elevation at around 1,500 m (Fig. 4A).

472 The diversification rate shifts are all located at the origin of Northern Andean  
473 clades and temporally match with periods of accelerated Andean uplift in this region  
474 (Gregory-Wodzicki, 2000; Hoorn *et al.*, 2010) (Cymbidieae, Fig. 1), or within a clade  
475 that already inhabited the Northern Andes (e.g. Pleurothallinae, Fig. 2). This is the  
476 period with fastest documented rates of Andean uplift in the Northern Andes (i.e.  
477 Venezuelan Andes and Northern Andes of Colombia; Hoorn *et al.*, 1995; Bermúdez *et*  
478 *al.*, 2015). In all three Cymbidieae clades, speciation rates peaked at 6 Ma, a time  
479 when the northern Andes reached ca. 4,000 m, their maximum mean paleoelevation  
480 (Bermúdez *et al.*, 2015). Contrary to Cymbidieae, we found no correlation between  
481 Andean uplift and Pleurothallidinae diversification (Table S11), consistent with the  
482 earlier colonization of the Northern Andean region. We hypothesize that is due to  
483 rapid radiation of migrating cool pre-adapted Pleurothallidinae lineages from Central  
484 America into already formed montane environments (Hoorn *et al.*, 2010). Similar  
485 radiation patterns have been already reported for *Lupinus*, *Bartsia*, Adoxaceae and  
486 Valerianaceae (Donoghue & Sanderson, 2015; Uribe-Convers & Tank, 2015).

487 Gentry proposed that the main mechanism underlying rapid speciation in the  
488 Andes was the evolution of novel plant-insect interactions (Gentry, 1982). The  
489 Cymbidieae are particularly known among biologists and ecologists because of the  
490 rich array of pollination syndromes and sexual systems they have evolved (e.g. sexual  
491 and food deceit, food and fragrance reward, dichogamy and environmental sex  
492 determination [Gerlach & Schill, 1991; Singer, 2002; Pansarin *et al.*, 2009; Gerlach &  
493 Pérez-Escobar, 2014]). Our analyses suggest that pollinator syndrome shifts do not

494 match with diversification rates shifts, although our data do not take into account  
495 pollinator shifts within given pollinator groups. This is particularly true for bee  
496 pollination syndrome, which is widespread in the tribe and likely overarch several  
497 transitions from different types of bee pollinator (e.g. oil to Euglossini bees as  
498 observed in Catasetinae). More field observations of pollinations are therefore needed  
499 to evaluate the relative role of pollinator shifts in contributing to Neotropical orchid  
500 diversification.

501

## 502 **Conclusion**

503         Based on two extensively sampled orchid phylogenies combined with  
504 statistically robust diversification models, our results reveal that Andean orchid  
505 diversification have closely tracked the Andean orogeny. Together with studies in  
506 other mega-diverse regions (Verboom *et al.*, 2009; Bruyn *et al.*, 2014), our results  
507 show that rapid recent speciation has moulded this area of exceptional species  
508 richness. In addition, our results highlight the crucial role of Amazonian lowlands as  
509 well as the Antillean and Central American regions as biotic sources for Andean  
510 biodiversity, providing cool pre-adapted lineages that dispersed into the Andes and  
511 further diversified *in situ*.

512         Contrary to general expectation, the rise of the Andes had little effect on  
513 restricting orchid biotic dispersal across the Neotropics. This suggests that mountains  
514 are semi-permeable barriers to lowland organisms, whose dispersal ability are more  
515 likely related to intrinsic traits (e.g. seed size, dispersal mechanism, mutualisms).  
516 Although both abiotic and biotic processes are clearly responsible for the exceptional  
517 species richness of the world's premier biodiversity hotspot (Antonelli & Sanmartín,  
518 2011; Hughes *et al.*, 2013), our results suggest that geological processes played a  
519 central and direct role in the diversification process. Finally, since the highest species  
520 richness in Cymbidieae is concentrated in the lowlands and the Pleurothallinae peak at  
521 mid-elevation, our study shows that Andean uplift dramatically affected the  
522 evolutionary assembly of both lowland and mid-elevation Andean forests, as  
523 originally hypothesized by Gentry (1982).

524

## 525 **Author contributions**



526 O.A.P., G.C. and A.A. designed research; O.A.P., A.K., D.B. and G.C. performed  
527 research; O.A.P., G.C., F.C., and N.M. analysed data; F.C. and D.S. contributed  
528 analytic tools; G.C. and O.P. wrote the paper with contributions from all authors.

529

### 530 **Acknowledgments**

531 We thank M. Whitten, G. Gerlach, and E. Pansarin for plant material; G. Gerlach,  
532 M.A. Blanco and G. Salazar for providing information on pollination. C. Bernau for  
533 dedicated IT support; A. Mulch for the compilation of surface uplift data from the  
534 Andes; L. Lagomarsino for discussion F. Pupulin and B. Gravendeel for their support  
535 on the Cymbidieae and Pleurothallidinae research. O.A.P. is supported by Colombian  
536 National Science Foundation (COLCIENCIAS) scholarship, G.C. is supported by the  
537 German Science Foundation grant (RE 603/20). F.L.C is supported by a Marie Curie  
538 grant (BIOMME project, IOF-627684). A.P.K and D.B. were supported by grants of  
539 the Alberta Mennega Foundation. N.J.M. was supported by the National Institute for  
540 Mathematical and Biological Synthesis, an Institute sponsored by the National  
541 Science Foundation through NSF Award #DBI-1300426, with additional support from  
542 The University of Tennessee, Knoxville, and is currently supported by Discovery  
543 Early Career Researcher Award DE150101773, funded by the Australian Research  
544 Council, and by The Australian National University. D.S. is funded by the Swedish  
545 Research Council (2015-04748). A.A. is supported by grants from the Swedish  
546 Research Council, the European Research Council under the European Union's  
547 Seventh Framework Program (FP/2007-2013, ERC Grant Agreement n. 331024), the  
548 Swedish Foundation for Strategic Research and a Wallenberg Academy Fellowship.

549

550

551

552

553

554

555

556

557

558

559

560 **References**

- 561 **Antonelli A, Dahlberg CJ, Carlgren KHI, Appelqvist T. 2009a.** Pollination of the  
562 Lady's slipper orchid (*Cypripedium calceolus*) in Scandinavia - taxonomic and  
563 conservational aspects. *Nordic Journal of Botany* **27**: 266–273.
- 564 **Antonelli A, Nylander JAA, Persson C, Sanmartí I. 2009b.** Tracing the impact of  
565 the Andean uplift on Neotropical plant evolution. **106**: 9749–9754.
- 566 **Antonelli A, Sanmartín I. 2011.** Why are there so many plant species in the  
567 Neotropics? *Taxon* **60**: 403–414.
- 568 **Arditti J, Ghani AKA. 2000.** Numerical and physical properties of orchid seeds and  
569 their biological implications. *New Phytologist* **145**: 367–421.
- 570 **Arroyo MTK, Armesto JJ, Primack RB. 1985.** Community studies in pollination  
571 ecology in the high temperate Andes of Central Chile II. Effect of temperature on  
572 visitation rates and pollination possibilities. *Plant Systematics and Evolution* **149**:  
573 187–203.
- 574 **Arroyo MTK, Primack RB, Armesto JJ. 1982.** Community studies in pollination  
575 ecology in the high temperate Andes of Central Chile I. Pollination mechanisms and  
576 altitudinal variation. *American Journal of Botany* **69**: 82–97.
- 577 **Balbuena JA, Míguez-Lozano R, Blasco-Costa I. 2013.** PACo: a novel procrustes  
578 application to cophylogenetic analysis. *PloS one* **8**: e61048.
- 579 **Barthlott W, Große-Veldmann B, Korotkova N. 2014.** *Orchid seed diversity: a*  
580 *scanning electron microscopy survey*. Berlin: Botanic Garden and Botanical Museum  
581 Berlin.
- 582 **Bell CD, Donoghue MJ. 2005.** Phylogeny and biogeography of Valerianaceae  
583 (Dipsacales) with special reference to the South American valerians. *Organisms,*  
584 *Diversity and Evolution* **5**: 147–159.
- 585 **Bermúdez M, Hoorn C, Bernet M, Carrillo E, Beek PA Van Der, Mora JL,**  
586 **Mehrkian K. 2015.** The detrital record of late-Miocene to Pliocene surface uplift and  
587 exhumation of the Venezuelan Andes in the Maracaibo and Barinas foreland basins.  
588 *Basin Research*: 10.1111/bre.12154.
- 589 **Blanco MA, Barboza G. 2005.** Pseudocopulatory Pollination in *Lepanthes*  
590 (Orchidaceae: Pleurothallidinae) by Fungus Gnats. *Annals of Botany* **95**: 763–772.
- 591 **Blanco MA, Carnevali G, Whitten WM, Singer RB, Koehler S, Williams NH,**  
592 **Ojeda I, Neubig KM, Endara L. 2007.** Generic realignment in Maxillariinae  
593 (Orchidaceae). *Lankesteriana* **7**: 515–537.

- 594 **Brumfield RT, Edwards SV. 2007.** Evolution into and out of the Andes: a Bayesian  
595 analysis of historical diversification in *Thamnophilus antshrikes*. *Evolution* **61**: 346–  
596 369.
- 597 **Bruyn M, Stelbrink B, Morley R, Hall R, Carvalho G, Cannon C, van den Bergh**  
598 **G, Meijaard E, Metcalfe I, Boitani L, et al. 2014.** Borneo and Indochina are major  
599 evolutionary hotspots for Southeast Asian biodiversity. *Systematic Biology* **63**: 879–  
600 901.
- 601 **Chase MW, Cameron KM, Freudenstein J V., Pridgeon AM, Salazar G, van den**  
602 **Berg C, Schuiteman A. 2015.** An updated classification of Orchidaceae. *Botanical*  
603 *Journal of the Linnean Society* **177**: 151–174.
- 604 **Chomicki G, Bidel LPR, Ming F, Coiro M, Zhang X, Wang Y, Baissac Y, Jay-**  
605 **allemand C, Renner SS. 2015.** The velamen protects photosynthetic orchid roots  
606 against UV-B damage , and a large dated phylogeny implies multiple gains and losses  
607 of this function during the Cenozoic. *New Phytologist* **205**: 1330–1341.
- 608 **van der Cingel N. 2001.** *An atlas of orchid pollination: America, Africa, Asia and*  
609 *Australia*. Rotterdam: Balkema Publishers.
- 610 **Condamine FL, Kergoat GJ. 2013.** Global biogeographical pattern of swallowtail  
611 diversification demonstrates alternative colonization routes in the Northern and  
612 Southern Hemispheres.
- 613 **Conran JG, Bannister JM, Lee DE. 2009.** Earliest orchid macrofossils: Early  
614 Miocene *Dendrobium* and *Earina* (Orchidaceae: Epidendroideae) from New Zealand.  
615 *American Journal of Botany* **96**: 466–474.
- 616 **Crain B, Tremblay R. 2012.** Update on the distribution of *Lepanthes caritensis*, a  
617 rare Puerto Rican endemic orchid. *Endangered Species Research* **18**: 89–94.
- 618 **Darriba D, Taboada GL, Doallo R, Posada D. 2012.** jModelTest 2: more models,  
619 new heuristics and parallel computing. *Nature Methods* **9**: 772–772.
- 620 **Darwin C. 1877.** *On the various contrivances by which british and foreign orchids*  
621 *are fertilised by insects*. New York: Appleton and CO.
- 622 **Donoghue MJ, Sanderson MJ. 2015.** Confluence, synnovation, and depauperons in  
623 plant diversification. *The New phytologist* **207**: 260–74.
- 624 **Donoghue MJ, Winkworth R. 2005.** *Viburnum* phylogeny based on combined  
625 molecular data: implications for taxonomy and biogeography. *American Journal of*  
626 *Botany* **92**: 653–666.
- 627 **Drummond AJ, Bouckaert RR. 2014.** *Bayesian evolutionary analysis with BEAST*

- 628 2. Cambridge University Press.
- 629 **Drummond C, Eastwood R, Miotto S, Hughes CE. 2012.** Multiple continental  
630 radiations and correlates of diversification in *Lupinus* (Leguminosae): testing for key  
631 innovation with incomplete taxon sampling. *Systematic Biology* **61**: 443–460.
- 632 **Fitzjohn RG. 2012.** Diversitree: comparative phylogenetic analyses of diversification  
633 in R. *Methods in Ecology and Evolution* **3**: 1084–1092.
- 634 **Gentry AH. 1982.** Neotropical floristic diversity: phytogeographical connections  
635 between Central and South America, Pleistocene climatic fluctuations, or an accident  
636 of the Andean orogeny? *Annals of the Missouri Botanical Garden* **69**: 557–593.
- 637 **Gentry AH, Dodson CH. 1987.** Diversity and biogeography of Neotropical vascular  
638 epiphytes. *Annals of the Missouri Botanical Garden* **74**: 205–233.
- 639 **Gerlach G. 2011.** The genus *Coryanthes*: a paradigm in ecology. *Lankesteriana* **11**:  
640 253–264.
- 641 **Gerlach G, Pérez-Escobar OA. 2014.** Looking for missins swans: Phylogenetics of  
642 *Cycnoches*. *Orchids* **83**: 434–437.
- 643 **Gerlach G, Schill R. 1991.** Composition of Orchid Scents Attracting Euglossine  
644 Bees. *Botanica Acta* **104**: 379–384.
- 645 **Givnish TJ, Spalink D, Ames M, Lyon SP, Hunter SJ, Zuluaga A, Doucette A,**  
646 **Caro GG, Mcdaniel J, Clements MA, et al. 2016.** Orchid historical biogeography ,  
647 diversification , Antarctica and the paradox of orchid dispersal. : 1–12.
- 648 **Givnish TJ, Spalink D, Ames M, Lyon SP, Hunter Z, Zuluaga A, Iles W,**  
649 **Clements MA, Arroyo MT, Leebens-Mack J, et al. 2015.** Orchid phylogenomics  
650 and multiple drivers of their extraordinary diversification. *Proceedings of the Royal*  
651 *Society B: Biological Sciences* **282**: 20151553.
- 652 **Goldberg E, Lancaster L, Ree RH. 2011.** Phylogenetic inference of reciprocal  
653 effects between geographic range evolution and diversification. *Systematic Biology*  
654 **60**: 451–465.
- 655 **Gregory-Wodzicki KM. 2000.** Uplift history of the Central and Northern Andes : a  
656 review. *Geological Society of America Bulletin* **112**: 1091–1105.
- 657 **von Hagen KB, Kadereit JW. 2003.** The diversification of *Halenia* (Gentianaceae):  
658 ecological opportunity versus key innovation. *Evolution* **57**: 2507–2518.
- 659 **Heibl C. 2014.** MEGAPTERA - Mega-Phylogeny Techniques in R. : 1–7.
- 660 **Hijmans RJ, Elith J. 2016.** Species distribution modeling with R.
- 661 **Hoorn C, Guerrero J, Sarmiento GA, Lorente MA. 1995.** Andean tectonics as a

- 662 cause for changing drainage patterns in Miocene northern South America. *Geology*  
663 **23**: 237–240.
- 664 **Hoorn C, Mosbrugger V, Mulch A, Antonelli A. 2013.** Biodiversity from mountain  
665 building. *Nature Geoscience* **6**: 154–154.
- 666 **Hoorn C, Wesselingh FP, Steege H, Bermudez M a, Mora A, Sevink J,**  
667 **Sanmartín I, Anderson CL, Figueiredo JP, Jaramillo C, et al. 2010.** Amazonia  
668 Through Time : Andean uplift, climate change, landscape evolution, and biodiversity.  
669 *Science* **330**: 927–931.
- 670 **Hughes CE, Atchison GW. 2015.** The ubiquity of alpine plant radiations: from the  
671 Andes to the Hengduan mountains. *New Phytologist* **207**: 275–282.
- 672 **Hughes C, Eastwood R. 2006.** Island radiation on a continental scale: exceptional  
673 rates of plant diversification after uplift of the Andes. *Proceedings of the National*  
674 *Academy of Sciences of the United States of America* **103**: 10334–10339.
- 675 **Hughes CE, Pennington RT, Antonelli A. 2013.** Neotropical plant evolution:  
676 assembling the big picture. *Botanical Journal of the Linnean Society* **171**: 1–18.
- 677 **Jost L. 2004.** Explosive local radiation of the genus *Teagueia* (Orchidaceae) in the  
678 upper Pastaza watershed of Ecuador. *Lyonia* **7**: 41–47.
- 679 **Karremans AP. 2016.** Genera Pleurothallidinarum: an updated phylogenetic  
680 overview of Pleurothallidinae. *Lankesteriana* **16**: 219–241.
- 681 **Kolanowska M. 2014.** The orchid flora of the Colombian Department of Valle del  
682 Cauca. *Revista Mexicana de Biodiversidad* **85**: 445–462.
- 683 **Kreft H, Koster N, Kuper W, Nieder J, Barthlott W. 2004.** Diversity and  
684 biogeography of vascular epiphytes in Western Amazonia, Yasuni, Ecuador. *Journal*  
685 *of Biogeography* **31**: 1463–1476.
- 686 **Krömer T, Gradstein SR. 2003.** Species richness of vascular epiphytes in two  
687 primary forests and fallows in the Bolivian Andes. *Selbyana* **24**: 190–195.
- 688 **Küper W, Kreft H, Nieder J, Köster N, Barthlott W. 2004.** Large-scale diversity  
689 patterns of vascular epiphytes in Neotropical montane rain forests. *Journal of*  
690 *Biogeography* **31**: 1477–1487.
- 691 **Lagomarsino L, Condamine FL, Antonelli A, Mulch A, Davis CC. 2016.** The  
692 abiotic and biotic drivers of rapid diversification in Andean bellflowers  
693 (Campanulaceae). *New Phytologist* **210**: 1430–1432.
- 694 **Lindley J. 1843.** Catasetidae. *Edwards's Botanical Register* **29**: sub t. 22.
- 695 **Luebert F, Hilger HH, Weigend M. 2011.** Diversification in the Andes: age and

- 696 origins of South American *Heliotropium* lineages (Heliotropiaceae, Boraginales).  
697 *Molecular Phylogenetics and Evolution* **61**: 90–102.
- 698 **Lugo MA, Ferrero M, Menoyo E, Estévez MC, Siñeriz F, Anton A. 2008.**  
699 Arbuscular mycorrhizal fungi and rhizospheric bacteria diversity along an altitudinal  
700 gradient in South American Puna grassland. *Microbial Ecology* **55**: 705–713.
- 701 **Madriñán S, Cortés AJ, Richardson JE. 2013.** Páramo is the world’s fastest  
702 evolving and coolest biodiversity hotspot. *Frontiers in Genetics* **4**: 1–7.
- 703 **Matzke NJ. 2013.** Probabilistic historical biogeography: new models for founder-  
704 event speciation, imperfect detection, and fossil allow improved accuracy and model-  
705 testing. *Frontiers of biogeography* **5**: 243–248.
- 706 **Matzke NJ. 2014.** Model selection in historical biogeography reveals that founder-  
707 event speciation is a crucial process in island clades. *Systematic Biology* **63**: syu056-.
- 708 **McGuire JA, Witt CC, Remsen J V, Corl A, Rabosky DL, Altshuler D, Dudley  
709 R. 2014.** Molecular phylogenetics and the diversification of Hummingbirds. *Current  
710 Biology* **24**: 1–7.
- 711 **Merckx VSFT, Hendriks K, Beentjes K, Mennes C, Becking LE, Peijnenburg  
712 KTCA, Afendy A, Arumugam N, Boer H De, Biun A, et al. 2015.** Evolution of  
713 endemism on a young tropical mountain. *Nature* **524**: 347–350.
- 714 **Miller MA, Schwartz T, Pickett BE, He S, Klem EB, Scheuermann RH,  
715 Passarotti M, Kaufman S, Leary MAO. 2015.** A RESTful API for access to  
716 phylogenetic tools via the CIPRES Science Gateway. *Evolutionary Bioinformatics* **11**:  
717 43–48.
- 718 **Morlon H, Lewitus E, Condamine FL, Manceau M, Clavel J, Drury J. 2016.**  
719 RPANDA: An R package for macroevolutionary analyses on phylogenetic trees.  
720 *Methods in Ecology and Evolution* **7**: 589–597.
- 721 **Myers N, Mittermeier RA, Mittermeier CG, Fonseca GAB, Kent J. 2000.**  
722 Biodiversity hotspots for conservation priorities. *Nature* **403**: 853–858.
- 723 **Nevado B, Atchison GW, Hughes CE, Filatov DA. 2016.** Widespread adaptive  
724 evolution during repeated evolutionary radiations in New World lupins. *Nature  
725 Communications* **7**: 1–9.
- 726 **Pandey M, Sharma J, Taylor DL, Yadon VL. 2013.** A narrowly endemic  
727 photosynthetic orchid is non-specific in its mycorrhizal associations. *Molecular  
728 Ecology* **22**: 2341–2354.
- 729 **Pansarin LM, Castro MDEM, Sazima M. 2009.** Osmophore and elaiophores of

- 730 *Grobya amherstiae* (Catasetinae, Orchidaceae) and their relation to pollination.  
731 *Botanical Journal of the Linnean Society* **159**: 408–415.
- 732 **Parra-Sánchez E, Retana J, Armenteras D. 2016.** Edge Influence on diversity of  
733 orchids in Andean cloud forests. *Forests* **7**: 1–13.
- 734 **Pennington RT, Lavin M, Särkinen T, Lewis GP, Klitgaard BB, Hughes CE.**  
735 **2010.** Contrasting plant diversification histories within the Andean biodiversity  
736 hotspot. *Proceedings of the National Academy of Sciences* **107**: 13783–13787.
- 737 **Pérez-Escobar OA, Balbuena JA, Gottschling M. 2016a.** Rumbling orchids : How  
738 to assess divergent evolution between chloroplast endosymbionts and the nuclear  
739 host. *Systematic Biology* **65**: 51–65.
- 740 **Pérez-Escobar OA, Gottschling M, Whitten WM, Salazar G, Gerlach G. 2016b.**  
741 Sex and the Catasetinae (Darwin’s favourite orchids). *Molecular Phylogenetics and*  
742 *Evolution* **97**: 1–10.
- 743 **Pirie MD, Chatrou LW, Mols JB, Erkens RHJ, Oosterhof J. 2006.** ‘Andean-  
744 centred’ genera in the short-branch clade of Annonaceae: Testing biogeographical  
745 hypotheses using phylogeny reconstruction and molecular dating. *Journal of*  
746 *Biogeography* **33**: 31–46.
- 747 **Pridgeon AM, Cribb PJ, Chase MW, Rasmussen FN. 2009.** *Genera*  
748 *Orchidacearum: Vol. 5. Epidendroideae (part two)* (AM Pridgeon, PJ Cribb, MW  
749 Chase, and FN Rasmussen, Eds.). Oxford: Oxford University Press.
- 750 **Pupulin F, Karremans AP, Gravendeel B. 2012.** A reconsideration of the  
751 empusellous species of *Specklinia* (Orchidaceae: Pleurothallidinae) in Costa Rica.  
752 *Phytotaxa* **63**: 1–20.
- 753 **Rabosky DL. 2014.** Automatic detection of key innovations, rate shifts, and  
754 diversity-dependence on phylogenetic trees. *PLoS ONE* **9**.
- 755 **Rabosky DL, Donnellan SC, Grundler M, Lovette IJ. 2014.** Analysis and  
756 visualization of complex Macroevolutionary dynamics: An example from Australian  
757 Scincid lizards. *Systematic Biology* **63**: 610–627.
- 758 **Ramirez SR, Eltz T, Fujiwara MK, Gerlach G, Goldman-Huertas B, Tsutsui ND,**  
759 **Pierce NE. 2011.** Asynchronous Diversification in a Specialized Plant-Pollinator  
760 Mutualism. *Science* **333**: 1742–1746.
- 761 **Ramírez SR, Gravendeel B, Singer RB, Marshall CR, Pierce NE. 2007.** Dating the  
762 origin of the Orchidaceae from a fossil orchid with its pollinator. *Nature* **448**: 1042–  
763 1045.

- 764 **Ramsey J, Ripley B. 2010.** pspline: penalized smoothing splines.
- 765 **Richter M, Diertl K, Emck P, Peters T, Beck E. 2009.** Reasons for an outstanding  
766 plant diversity in the tropical Andes of Southern Ecuador. *Landscape Online* **12**: 1–  
767 35.
- 768 **Santos JC, Coloma L a., Summers K, Caldwell JP, Ree R, Cannatella DC. 2009.**  
769 Amazonian amphibian diversity is primarily derived from late Miocene Andean  
770 lineages. *PLoS Biology* **7**: 0448–0461.
- 771 **Scott A, Ram K, Hart T, Chamberlain MS. 2015.** Package ‘spocc’.
- 772 **Simpson GG. 1953.** *The major features of evolution*. New York: Columbia  
773 University Press.
- 774 **Singer RB. 2002.** The pollination mechanism in *Trigonidium obtusum* Lindl  
775 (Orchidaceae: Maxillariinae): sexual mimicry and trap-flowers. *Annals of Botany* **89**:  
776 157–163.
- 777 **Smith BT, McCormack JE, Cuervo M, Hickerson MJ, Aleixo A, Burney CW,**  
778 **Xie X, Harvey MG, Faircloth BC, Cadena CD, et al. 2014.** The drivers of tropical  
779 speciation. *Nature* **515**: 406–409.
- 780 **Stamatakis A. 2014.** RAxML version 8: A tool for phylogenetic analysis and post-  
781 analysis of large phylogenies. *Bioinformatics* **30**: 1312–1313.
- 782 **ter Steege H, Pitman NC, Sabatier D, Baraloto C, Salomão RP, Guevara JE,**  
783 **Phillips OL, Castilho C V, Magnusson WE, Molino J-F, et al. 2013.**  
784 Hyperdominance in the Amazonian tree flora. *Science* **342**: 325–342.
- 785 **Talavera G, Castresana J. 2007.** Improvement of phylogenies after removing  
786 divergent and ambiguously aligned blocks from protein sequence alignments.  
787 *Systematic Biology* **56**: 564–577.
- 788 **Tremblay RL, Ackerman JD. 2001.** Gene flow and effective population size in  
789 *Lepanthes* (Orchidaceae): a case for genetic drift. *Biological Journal of the Linnean*  
790 *Society* **72**: 47–62.
- 791 **Uribe-Convers S, Tank DC. 2015.** Shifts in diversification rates linked to  
792 biogeographic movement into new areas: An example of a recent radiation in the  
793 Andes. *American Journal of Botany* **102**: 1–16.
- 794 **Valencia R, Balslev H, Miño C G. 1994.** High tree alpha-diversity in Amazonian  
795 Ecuador. *Biodiversity and Conservation* **3**: 21–28.
- 796 **Vargas P, Zardoya R. 2014.** *The tree of life*. Sunderland: Sinauer Associates.
- 797 **Verboom GA, Archibald JK, Bakker FT, Bellstedt DU, Conrad F, Dreyer L,**



798 **Forest F, Galley C, Goldblatt P, Henning J, et al. 2009.** Origin and diversification  
799 of the Greater Cape flora : Ancient species repository , hot-bed of recent radiation , or  
800 both ? *Molecular Phylogenetics and Evolution* **51**: 44–53.

801 **Whitten WM, Neubig KM, Williams NH. 2014.** Generic and subtribal relationships  
802 in neotropical Cymbidieae (Orchidaceae) based on matK/ycf1 plastid data.  
803 *Lankesteriana* **13**: 375–392.

804 **Willis JC. 1922.** *Age and area*. London: Cambridge University Press.

805 **Zotz G, Winkler U. 2013.** Aerial roots of epiphytic orchids : the velamen radicum  
806 and its role in water and nutrient uptake. : 733–741.

807

808

809

810

811

812

813

814

815

816

817

818

819

820

821

822

823

824

825

826

827

828

829

830

831

832 **Figure legends**

833 **Figure 1.** Biogeographic history of Cymbidieae orchids. Letters on colored circles  
834 at nodes indicate the estimated ancestral area with the highest probability as  
835 inferred by BioGeoBEARS. Branches are color-coded following the reconstructed  
836 area of their corresponding node, and geographical ranges of every taxon are  
837 shown as vertical bars in front of the terminals. The black start indicates the  
838 MRCA of Cymbidieae. Gray arrows show the periods of accelerated Andean  
839 uplift (Gregory-Wodzicki, 2000). Changes on shifts of diversification rates are  
840 shown as red pale circles on branches. Range expansions, local extinctions and  
841 cladogenetic events via vicariance are indicated on branches with black, yellow  
842 arrows and red crosses, respectively. Sub-tribe members of Cymbidieae are color-  
843 coded. Right panels show selected representatives of (a) Cymbidiinae  
844 (*Grammatophyllum measuresianum*); (b) Cyrtopodiinae (*Cyrtopodium*  
845 *polyphyllum*; photo by Luiz Varella); (c) Eulophiinae (*Eulophia streptopetala*); (d)  
846 Catasetinae (*Cynoches egertonianum*); (e) Zygopetaliinae (*Zygopetalum* aff.  
847 *brachypetalum*). (f) Coeliopsidiinae (*Peristeria cerina*); (g) Stanhopeinae  
848 (*Sievenkingia* sp.); (h) Maxillariinae (*Cryptocentrum* sp.); (i) Oncidiinae  
849 (*Trichoceros* sp.). Photos (except b): O. Pérez. (Inset) Coded areas for  
850 biogeographical analysis. Political divisions obtained from DIVA-GIS  
851 (<http://www.diva-gis.org/gdata>).

852

853 **Figure 2.** Biogeographic history of Pleurothallidinae orchids. Letters on colored  
854 circles at nodes indicate the estimated ancestral area with the highest probability  
855 as inferred by BioGeoBEARS. Branches are color-coded following the  
856 reconstructed area of their corresponding node, and geographical ranges of every  
857 taxon are shown as vertical bars in front of the terminals. The black start indicates  
858 the MRCA of Pleurothallidinae. Gray arrows show the periods of accelerated  
859 Andean uplift (Gregory-Wodzicki, 2000). Changes on shifts of diversification  
860 rates are shown as red pale circles on branches. Range expansions, local  
861 extinctions and cladogenetic events via vicariance are indicated on branches with  
862 black, yellow arrows and red crosses, respectively. Generic members of  
863 Pleurothallidinae are color-coded. Right panels show selected representatives of  
864 (a) *Lepanthes* (*Lepanthes* sp.); (b) *Dracula* (*D. astuta*); (c) *Masdevallia* (*M.*  
865 *utricularia*); (d) *Muscarella* (*M. exesilabia*); (e) *Platystele* (*P. porquinqua*); (f)

866 *Pabstiella* (*P. ephemera*); (h) *Pleurothallis* (*P. adventurae*); (i) *Myoxanthus* (*M.*  
867 *colothrix*). Photos: A.Karremans, D.Bogarín and O.Pérez. (Inset) Coded areas for  
868 biogeographical analysis. Political divisions obtained from DIVA-GIS  
869 (<http://www.diva-gis.org/gdata>).

870

871 **Figure 3.** Diversification of the Cymbidieae. (A) Richness through elevation plot  
872 for 55% (>20,000 herbarium records) of the ca. 4000 Cymbidieae species. (B)  
873 Speciation rate plot (phylorate) showing the best configuration shift identified by  
874 BAMM. (C) Density probability plots of speciation, extinction and net  
875 diversification rates per area identified by GeoSSE. Area “A” refers to species  
876 restricted to the Northern Andes; Area “B” refers to species occurring in all areas  
877 except Northern Andes. (D) Speciation rate map estimated from BAMM  
878 (Materials and Methods). (E) Average paleoelevation of the central and northern  
879 Andes. (F) Paleoelevation-dependent models applied to the four clades detected by  
880 BAMM to have significantly higher diversification rates than others. Lineages in  
881 (B) are color coded in the same way as shown in Figure 1.

882

883 **Figure 4.** Diversification of the Pleurothallidinae. (A) Richness through elevation  
884 plot for 50% (>9000 herbarium records) of the ca. 5000 Pleurothallidinae species.  
885 (B) Speciation rate plot (phylorate) showing the best configuration shift identified  
886 by BAMM. (C) Density probability plots of speciation, extinction and net  
887 diversification rates per area identified by GeoSSE. Area “A” refers to species  
888 restricted to the Northern Andes; Area “B” refers to species occurring in all areas  
889 except Northern Andes. (D) Speciation rate map estimated from BAMM  
890 (Materials and Methods). Lineages in (B) are color coded in the same way as  
891 shown in Figure 2.

892

### 893 **Online Supplementary Material (OSM)**

894 Appendix 1: Extended Materials and Methods

895 Supplementary figures S1-S29

896 Supplementary tables S1-S11

897

**Figure 1**

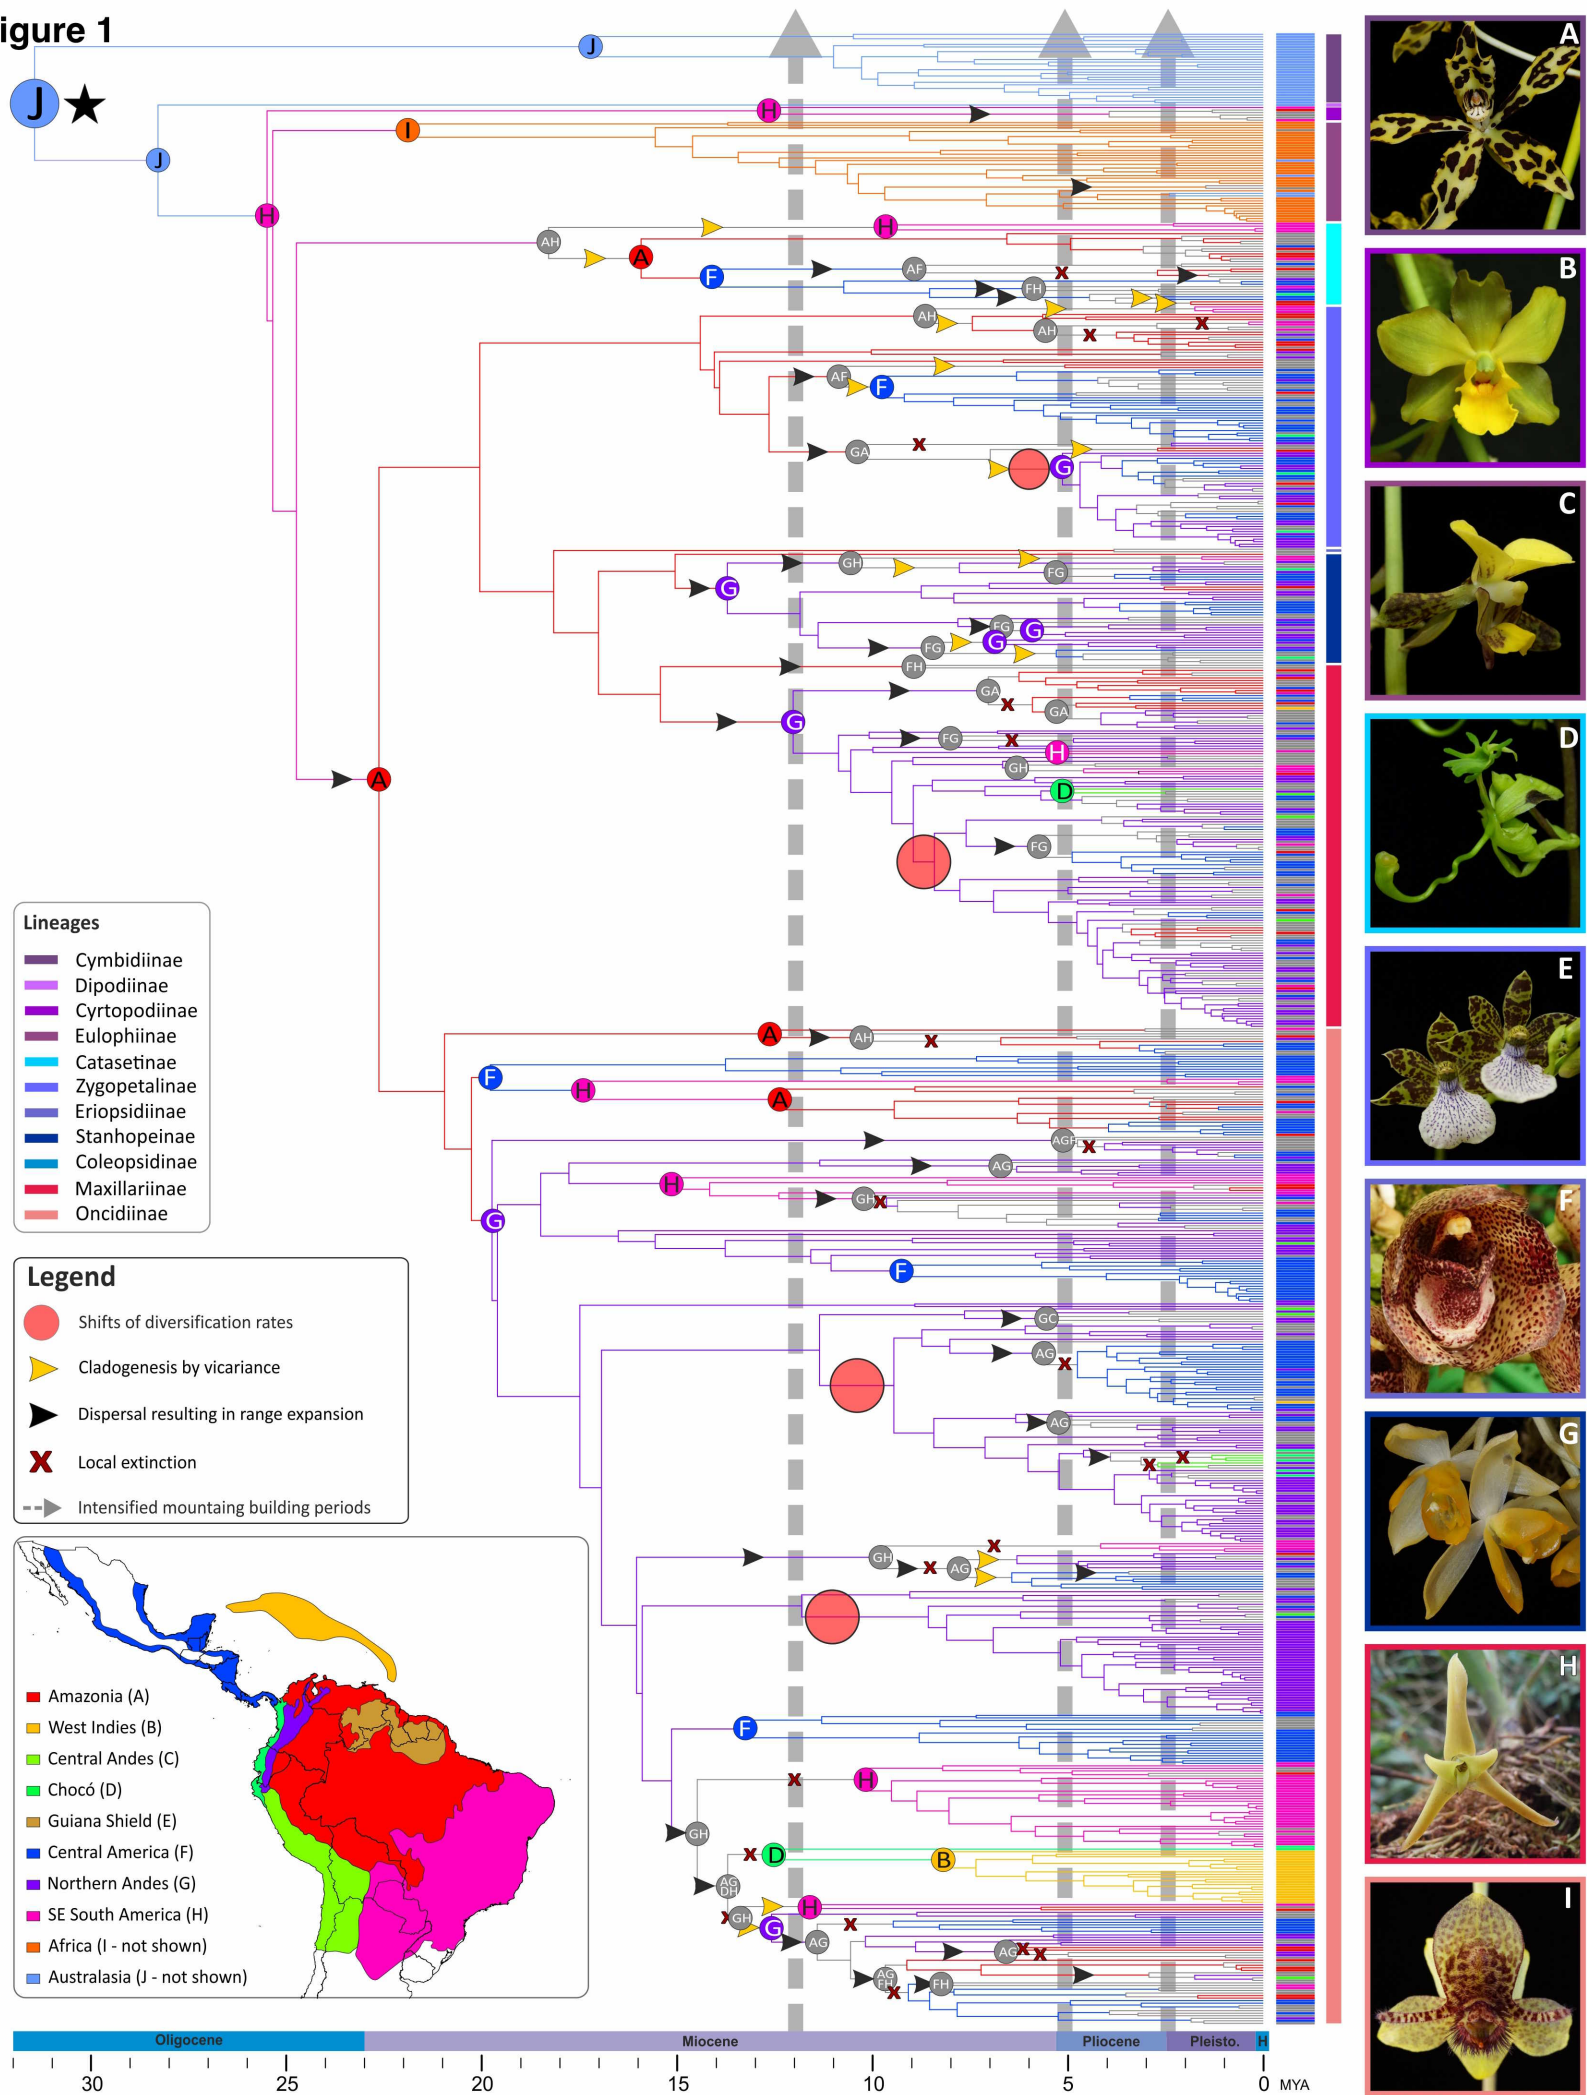

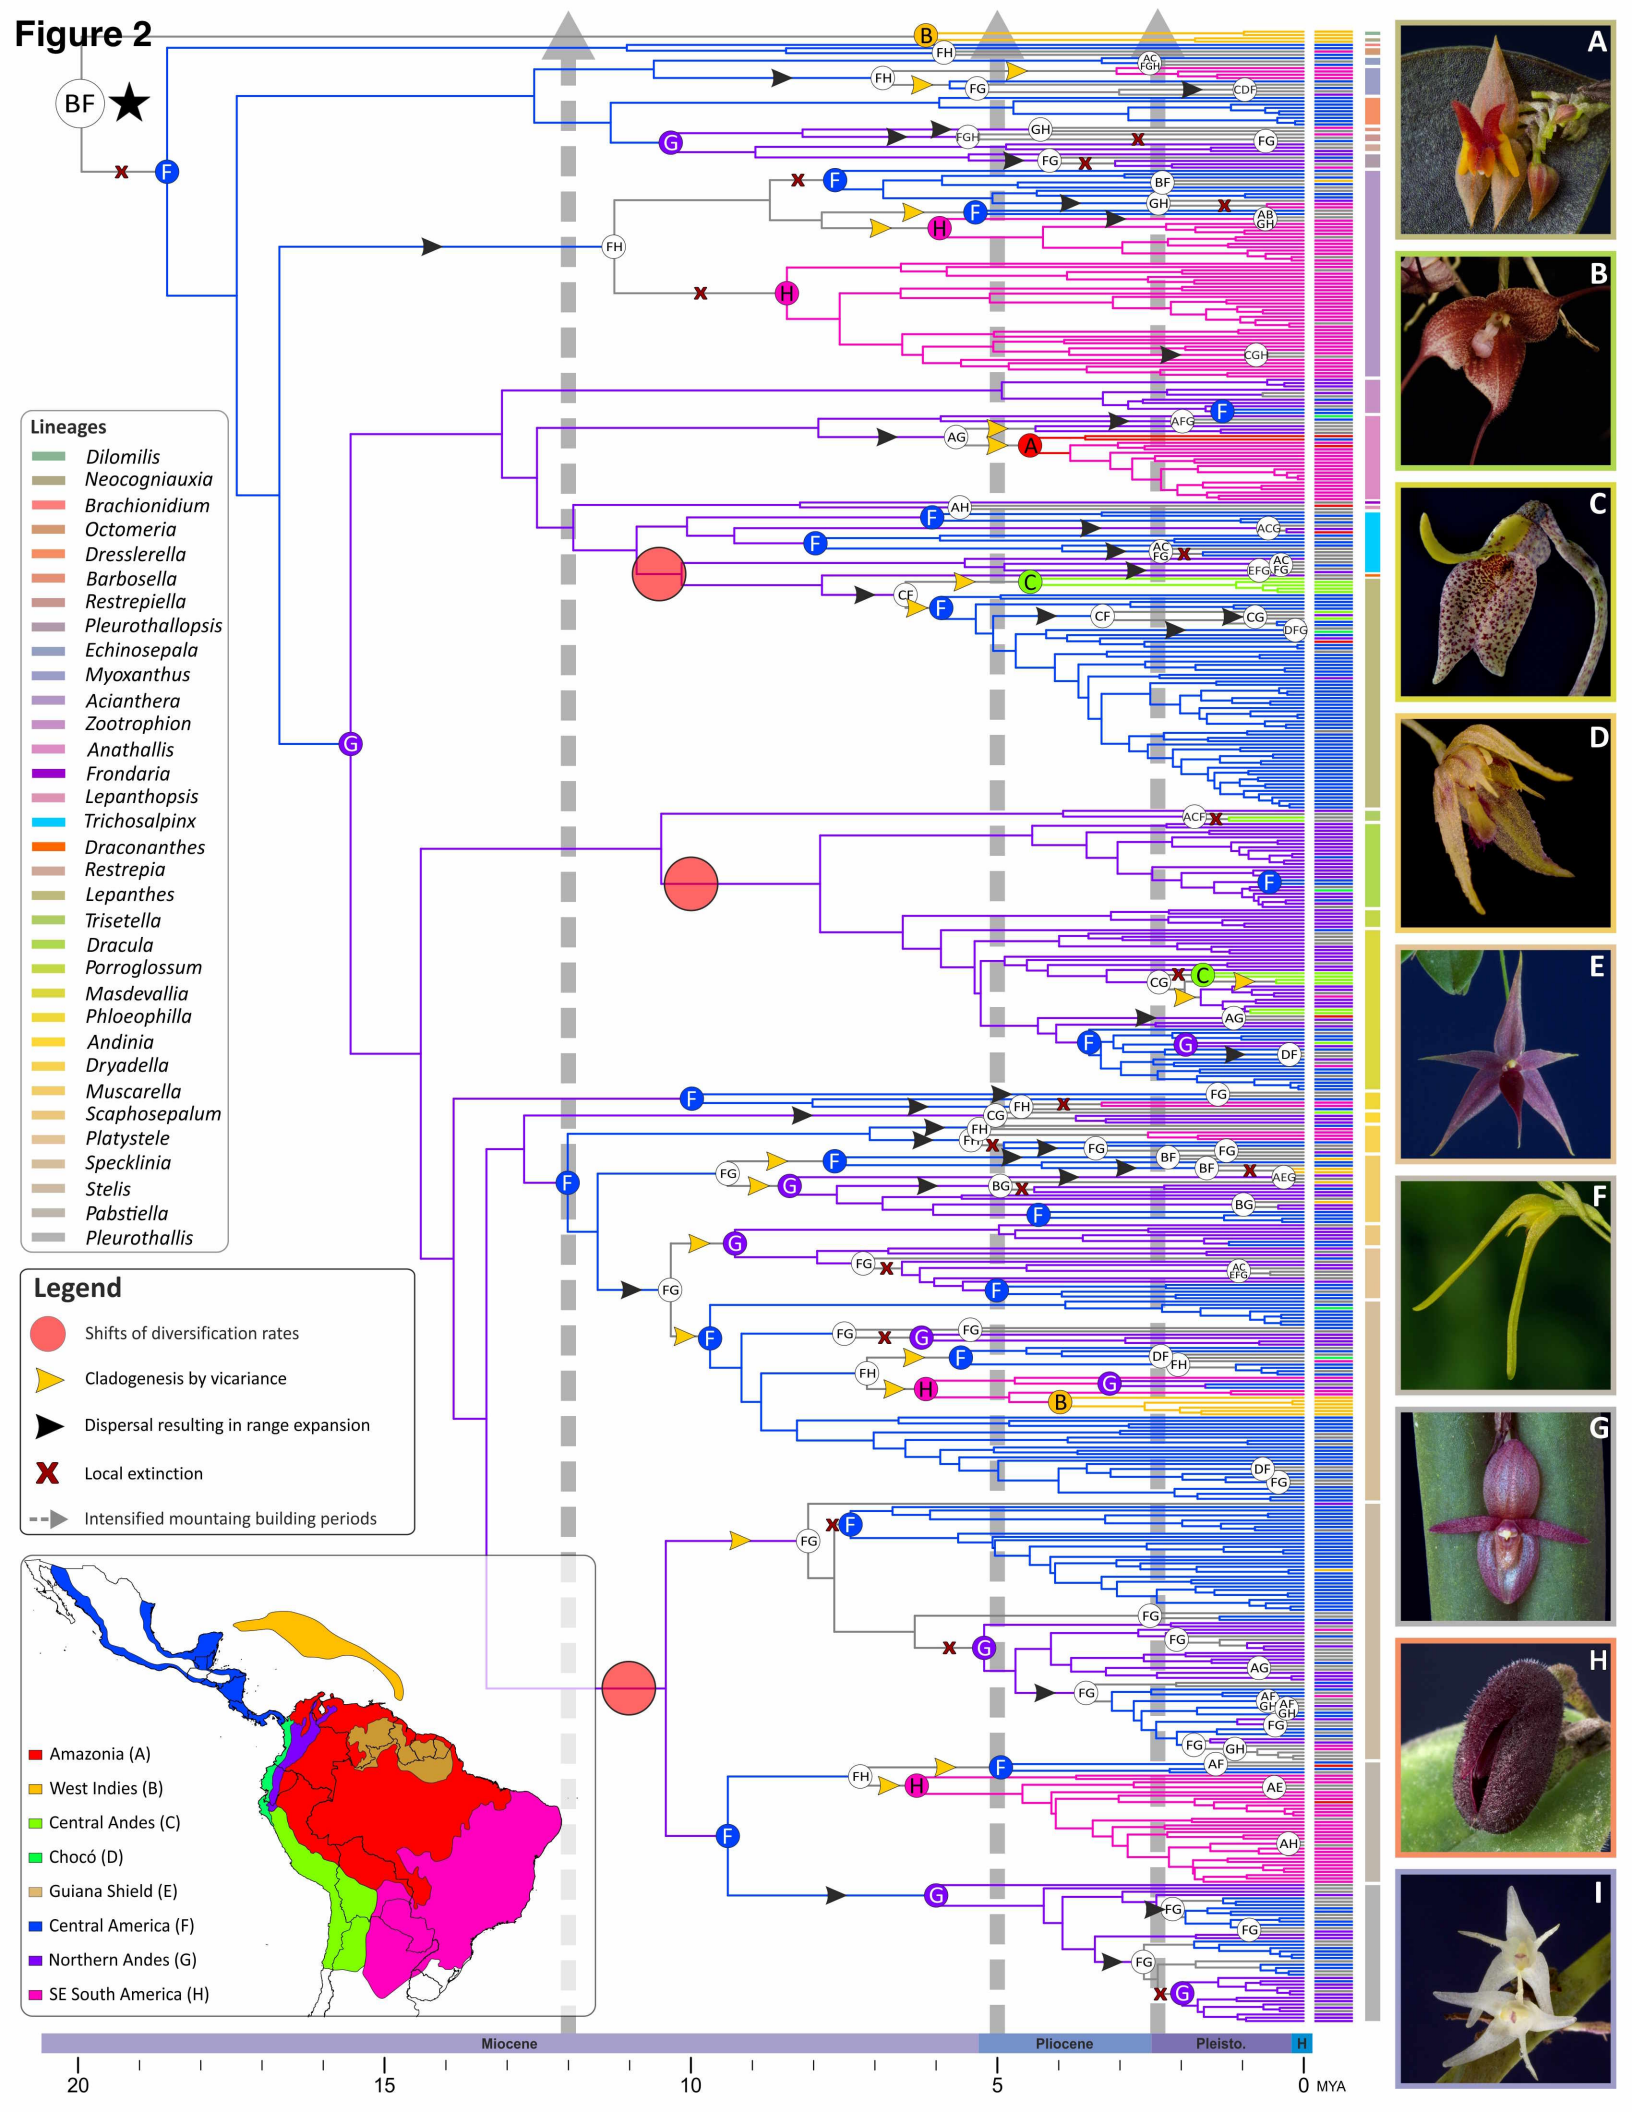

Figure 3

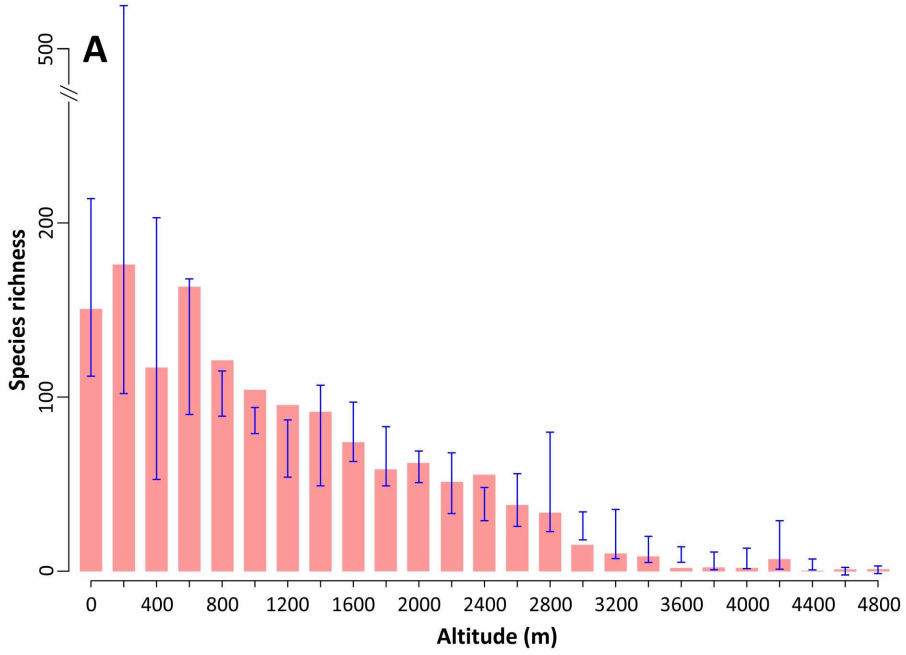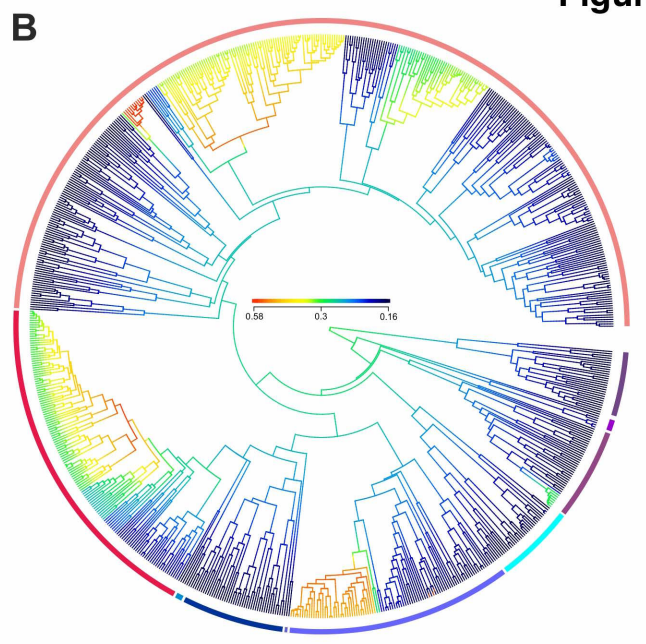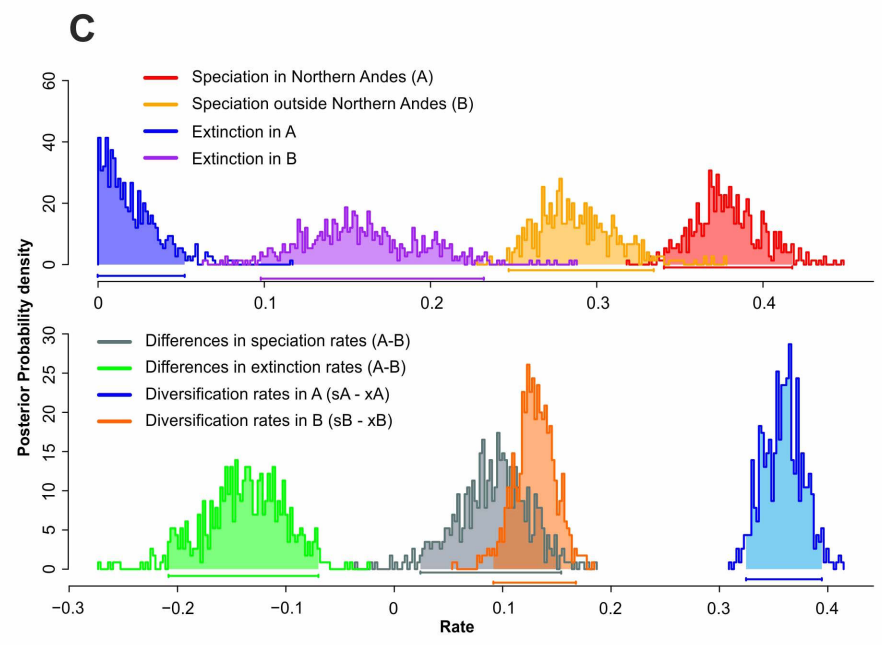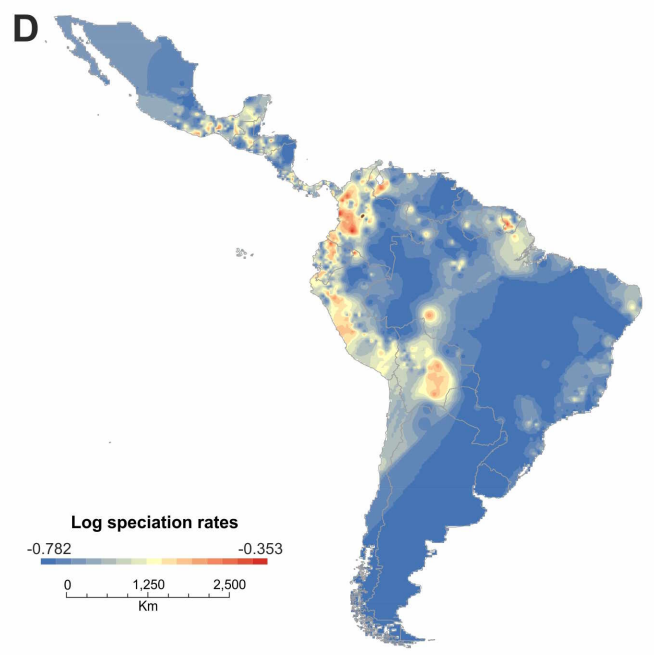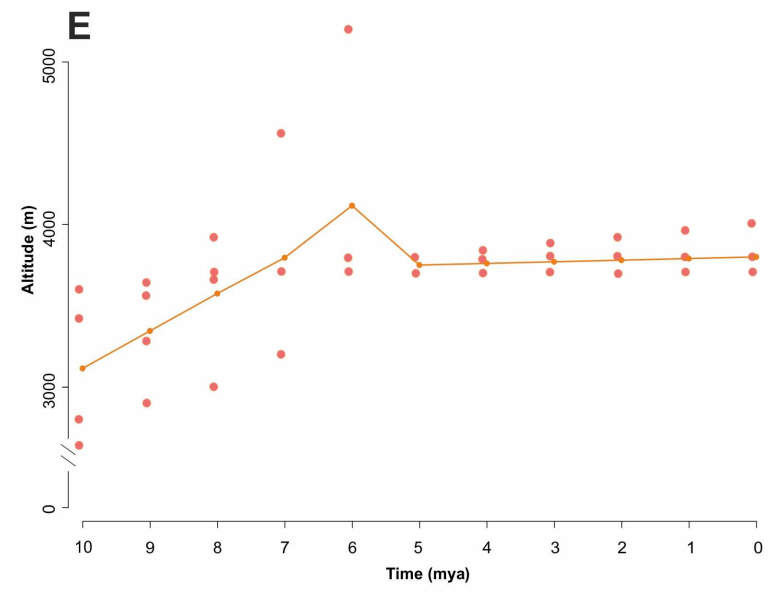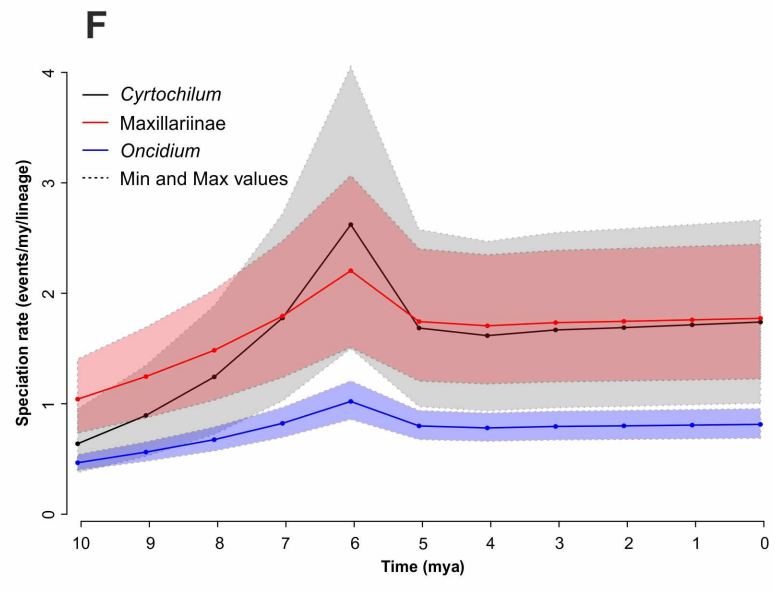

**Figure 4**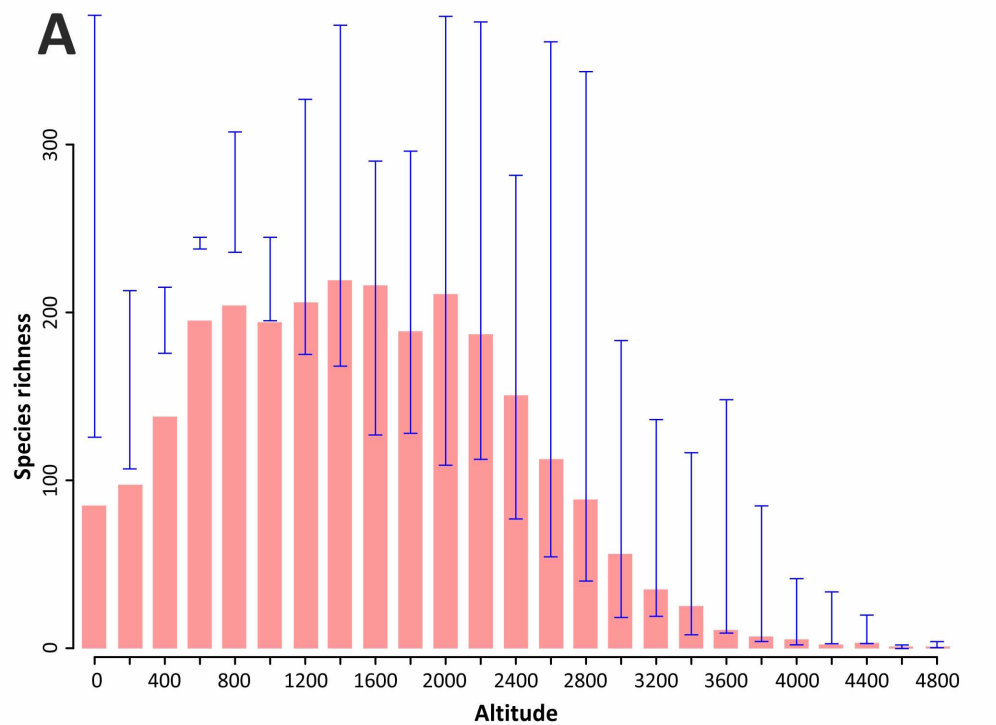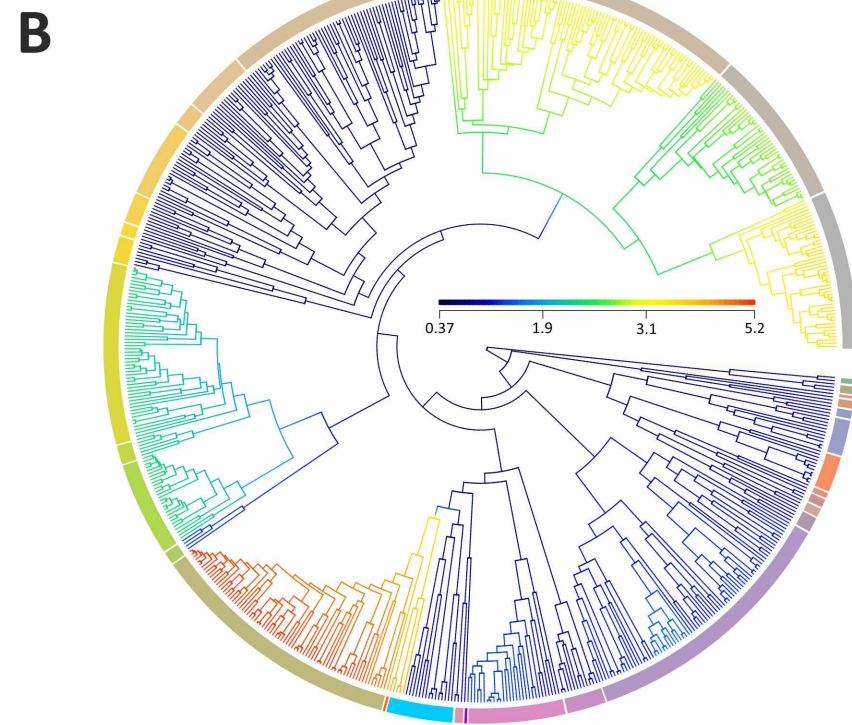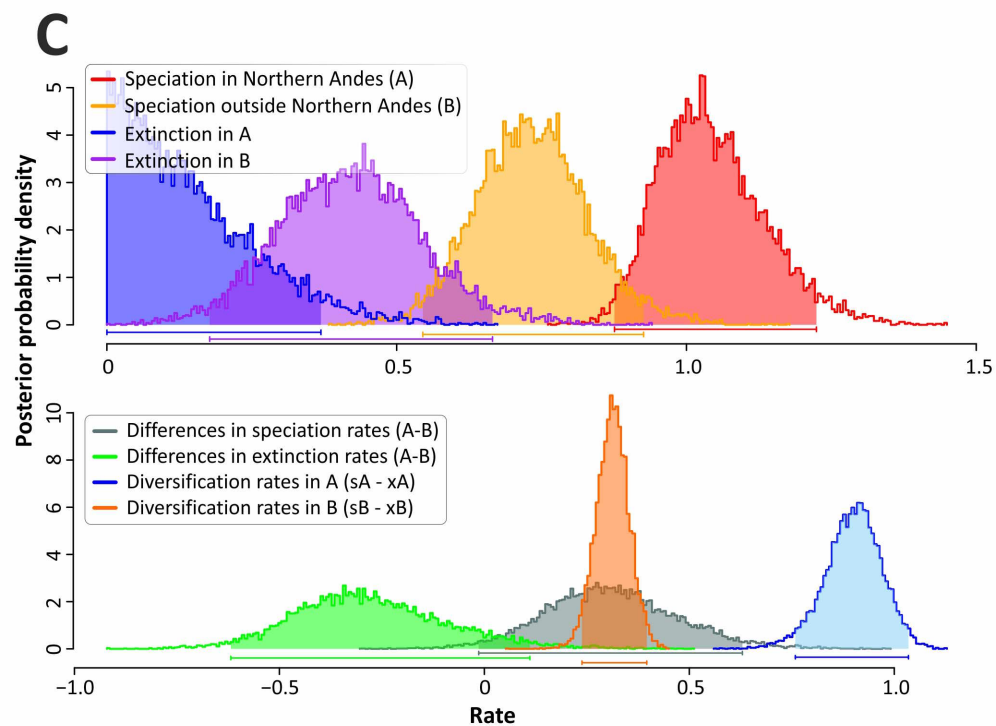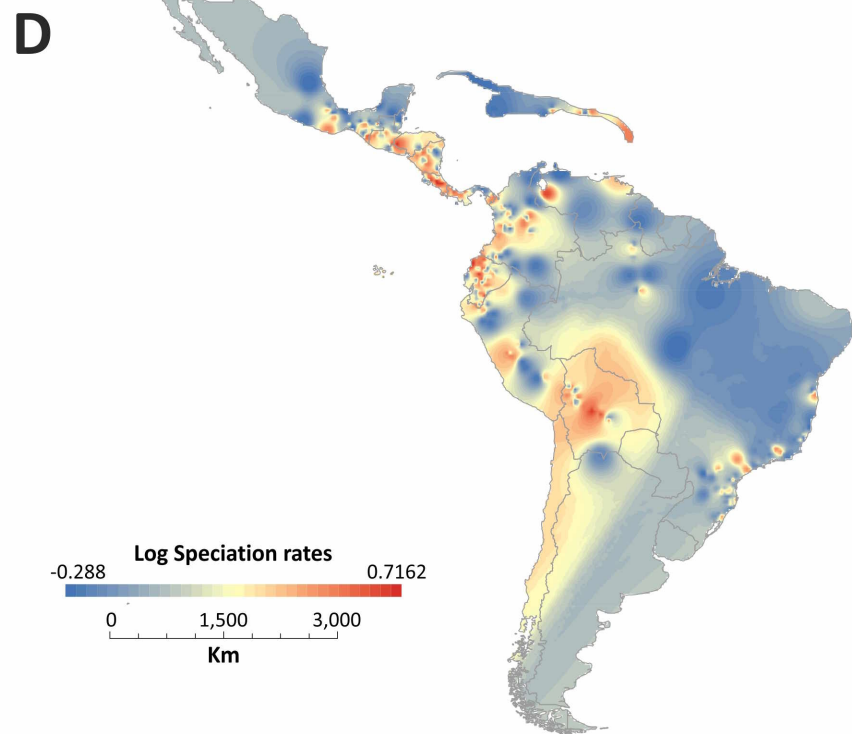

Source: http://biorxiv.org/content/10.1101/106302v1.full.pdf
